# Supplementary material for: Multiple Genome Wide Association Mapping Models Identify Quantitative Trait Nucleotides for Brown Planthopper (Nilaparvata lugens) Resistance in MAGIC Indica Population of Rice
Source: MDPI journal article supplement (doi:10.3390/vaccines8040608), 2020-10-14
Supplement: s1 [file s1]

**Supplementary Table S1: Pedigree details of 391 RiMi population**

| S. NO. | GBS CODE | DESIGNATION                            |
|--------|----------|----------------------------------------|
| 1      | MIB_3400 | IR 93326:9-B-21-3-4-1RGA-2RGA-1-B-B    |
| 2      | MIB_3406 | IR 93326:15-B-22-12-4-1RGA-2RGA-1-B-B  |
| 3      | MIB_3408 | IR 93326:17-B-8-5-7-1RGA-2RGA-1-B-B    |
| 4      | MIB_3409 | IR 93326:18-B-12-7-15-1RGA-2RGA-1-B-B  |
| 5      | MIB_3414 | IR 93326:23-B-4-8-12-1RGA-2RGA-1-B-B   |
| 6      | MIB_3415 | IR 93326:24-B-11-8-16-1RGA-2RGA-1-B-B  |
| 7      | MIB_3416 | IR 93326:25-B-6-13-22-1RGA-2RGA-1-B-B  |
| 8      | MIB_3417 | IR 93327:1-B-7-21-25-1RGA-2RGA-1-B-B   |
| 9      | MIB_3419 | IR 93327:3-B-13-7-5-1RGA-2RGA-1-B-B    |
| 10     | MIB_3421 | IR 93327:5-B-15-3-8-1RGA-2RGA-1-B-B    |
| 11     | MIB_3422 | IR 93327:6-B-17-5-20-1RGA-2RGA-1-B-B   |
| 12     | MIB_3423 | IR 93327:7-B-16-4-9-1RGA-2RGA-1-B-B    |
| 13     | MIB_3427 | IR 93327:11-B-8-8-17-1RGA-2RGA-1-B-B   |
| 14     | MIB_3432 | IR 93327:17-B-5-13-12-1RGA-2RGA-1-B-B  |
| 15     | MIB_3434 | IR 93327:19-B-21-15-23-1RGA-2RGA-1-B-B |
| 16     | MIB_3438 | IR 93327:24-B-7-12-12-1RGA-2RGA-1-B-B  |
| 17     | MIB_3439 | IR 93327:25-B-22-16-17-1RGA-2RGA-1-B-B |
| 18     | MIB_3441 | IR 93327:27-B-8-19-6-1RGA-2RGA-1-B-B   |
| 19     | MIB_3442 | IR 93327:28-B-12-8-22-1RGA-2RGA-1-B-B  |
| 20     | MIB_3446 | IR 93327:32-B-19-25-12-1RGA-2RGA-1-B-B |
| 21     | MIB_3448 | IR 93327:34-B-12-5-22-1RGA-2RGA-1-B-B  |
| 22     | MIB_3450 | IR 93327:36-B-23-8-15-1RGA-2RGA-1-B-B  |
| 23     | MIB_3453 | IR 93327:39-B-19-9-12-1RGA-2RGA-1-B-B  |
| 24     | MIB_3456 | IR 93327:42-B-17-17-13-1RGA-2RGA-1-B-B |
| 25     | MIB_3457 | IR 93327:43-B-16-24-8-1RGA-2RGA-1-B-B  |
| 26     | MIB_3466 | IR 93328:10-B-8-12-19-1RGA-2RGA-1-B-B  |
| 27     | MIB_3467 | IR 93328:11-B-12-17-25-1RGA-2RGA-1-B-B |
| 28     | MIB_3469 | IR 93328:13-B-8-6-23-1RGA-2RGA-1-B-B   |
| 29     | MIB_3471 | IR 93328:15-B-8-12-14-1RGA-2RGA-1-B-B  |
| 30     | MIB_3474 | IR 93328:18-B-14-12-22-1RGA-2RGA-1-B-B |
| 31     | MIB_3475 | IR 93328:19-B-11-12-6-1RGA-2RGA-1-B-B  |
| 32     | MIB_3476 | IR 93328:20-B-8-22-7-1RGA-2RGA-1-B-B   |
| 33     | MIB_3477 | IR 93328:21-B-13-15-18-1RGA-2RGA-1-B-B |
| 34     | MIB_3478 | IR 93328:22-B-14-15-6-1RGA-2RGA-1-B-B  |
| 35     | MIB_3479 | IR 93328:23-B-23-11-17-1RGA-2RGA-1-B-B |
| 36     | MIB_3480 | IR 93328:24-B-25-8-15-1RGA-2RGA-1-B-B  |
| 37     | MIB_3481 | IR 93328:25-B-19-12-15-1RGA-2RGA-1-B-B |
| 38     | MIB_3483 | IR 93328:27-B-19-8-21-1RGA-2RGA-1-B-B  |
| 39     | MIB_3484 | IR 93328:28-B-23-13-21-1RGA-2RGA-1-B-B |

|    |          |                                        |
|----|----------|----------------------------------------|
| 40 | MIB_3487 | IR 93328:31-B-13-3-13-1RGA-2RGA-1-B-B  |
| 41 | MIB_3488 | IR 93328:32-B-21-8-5-1RGA-2RGA-1-B-B   |
| 42 | MIB_3494 | IR 93328:38-B-17-14-11-1RGA-2RGA-1-B-B |
| 43 | MIB_3495 | IR 93328:39-B-15-23-14-1RGA-2RGA-1-B-B |
| 44 | MIB_3496 | IR 93328:40-B-15-25-16-1RGA-2RGA-1-B-B |
| 45 | MIB_3503 | IR 93329:7-B-11-6-14-1RGA-2RGA-1-B-B   |
| 46 | MIB_3504 | IR 93329:8-B-14-17-16-1RGA-2RGA-1-B-B  |
| 47 | MIB_3505 | IR 93329:9-B-16-15-14-1RGA-2RGA-1-B-B  |
| 48 | MIB_3506 | IR 93329:10-B-15-15-2-1RGA-2RGA-1-B-B  |
| 49 | MIB_3507 | IR 93329:11-B-18-22-16-1RGA-2RGA-1-B-B |
| 50 | MIB_3508 | IR 93329:12-B-14-21-11-1RGA-2RGA-1-B-B |
| 51 | MIB_3525 | IR 93329:29-B-1-23-7-1RGA-2RGA-1-B-B   |
| 52 | MIB_3532 | IR 93329:36-B-21-9-14-1RGA-2RGA-1-B-B  |
| 53 | MIB_3535 | IR 93329:39-B-12-16-8-1RGA-2RGA-1-B-B  |
| 54 | MIB_3538 | IR 93329:42-B-14-16-18-1RGA-2RGA-1-B-B |
| 55 | MIB_3539 | IR 93329:44-B-8-20-4-1RGA-2RGA-1-B-B   |
| 56 | MIB_3540 | IR 93329:45-B-14-13-10-1RGA-2RGA-1-B-B |
| 57 | MIB_3546 | IR 93329:51-B-18-1-21-1RGA-2RGA-1-B-B  |
| 58 | MIB_3548 | IR 93329:53-B-4-21-23-1RGA-2RGA-1-B-B  |
| 59 | MIB_3549 | IR 93329:54-B-10-20-23-1RGA-2RGA-1-B-B |
| 60 | MIB_3553 | IR 93329:58-B-12-21-4-1RGA-2RGA-1-B-B  |
| 61 | MIB_3554 | IR 93329:59-B-14-25-20-1RGA-2RGA-1-B-B |
| 62 | MIB_3556 | IR 93329:61-B-21-12-21-1RGA-2RGA-1-B-B |
| 63 | MIB_3572 | IR 93330:14-B-15-11-21-1RGA-2RGA-1-B-B |
| 64 | MIB_3573 | IR 93330:15-B-16-11-18-1RGA-2RGA-1-B-B |
| 65 | MIB_3594 | IR 93330:36-B-25-23-15-1RGA-2RGA-1-B-B |
| 66 | MIB_3595 | IR 93330:37-B-9-15-16-1RGA-2RGA-1-B-B  |
| 67 | MIB_3598 | IR 93330:41-B-10-17-14-1RGA-2RGA-1-B-B |
| 68 | MIB_3603 | IR 93330:46-B-16-18-17-1RGA-2RGA-1-B-B |
| 69 | MIB_3604 | IR 93330:47-B-13-9-5-1RGA-2RGA-1-B-B   |
| 70 | MIB_3606 | IR 93330:49-B-14-19-16-1RGA-2RGA-1-B-B |
| 71 | MIB_3620 | IR 93331:8-B-7-18-21-1RGA-2RGA-1-B-B   |
| 72 | MIB_3621 | IR 93331:9-B-10-10-12-1RGA-2RGA-1-B-B  |
| 73 | MIB_3626 | IR 93331:14-B-9-16-8-1RGA-2RGA-1-B-B   |
| 74 | MIB_3629 | IR 93331:17-B-12-14-20-1RGA-2RGA-1-B-B |
| 75 | MIB_3630 | IR 93331:18-B-13-21-10-1RGA-2RGA-1-B-B |
| 76 | MIB_3636 | IR 93331:24-B-17-16-18-1RGA-2RGA-1-B-B |
| 77 | MIB_3637 | IR 93331:25-B-20-16-19-1RGA-2RGA-1-B-B |
| 78 | MIB_3644 | IR 93331:32-B-18-10-8-1RGA-2RGA-1-B-B  |
| 79 | MIB_3645 | IR 93331:33-B-19-20-17-1RGA-2RGA-1-B-B |
| 80 | MIB_3668 | IR 93332:22-B-22-4-18-1RGA-2RGA-1-B-B  |

|     |          |                                        |
|-----|----------|----------------------------------------|
| 81  | MIB_3669 | IR 93332:23-B-9-8-18-1RGA-2RGA-1-B-B   |
| 82  | MIB_3672 | IR 93332:26-B-22-17-18-1RGA-2RGA-1-B-B |
| 83  | MIB_3675 | IR 93332:29-B-18-10-23-1RGA-2RGA-1-B-B |
| 84  | MIB_3677 | IR 93332:31-B-14-5-19-1RGA-2RGA-1-B-B  |
| 85  | MIB_3686 | IR 93332:40-B-8-15-9-1RGA-2RGA-1-B-B   |
| 86  | MIB_3688 | IR 93332:42-B-12-19-6-1RGA-2RGA-1-B-B  |
| 87  | MIB_3691 | IR 93332:45-B-8-23-19-1RGA-2RGA-1-B-B  |
| 88  | MIB_3693 | IR 93333:1-B-10-3-20-1RGA-2RGA-1-B-B   |
| 89  | MIB_3695 | IR 93333:4-B-8-19-8-1RGA-2RGA-1-B-B    |
| 90  | MIB_3707 | IR 93333:18-B-19-7-16-1RGA-2RGA-1-B-B  |
| 91  | MIB_3708 | IR 93333:19-B-17-12-18-1RGA-2RGA-1-B-B |
| 92  | MIB_3726 | IR 93333:40-B-12-12-22-1RGA-2RGA-1-B-B |
| 93  | MIB_3728 | IR 93333:42-B-17-20-20-1RGA-2RGA-1-B-B |
| 94  | MIB_3732 | IR 93334:1-B-20-12-9-1RGA-2RGA-1-B-B   |
| 95  | MIB_3737 | IR 93334:6-B-9-19-22-1RGA-2RGA-1-B-B   |
| 96  | MIB_3739 | IR 93334:8-B-10-8-4-1RGA-2RGA-1-B-B    |
| 97  | MIB_3742 | IR 93334:11-B-4-8-1-1RGA-2RGA-1-B-B    |
| 98  | MIB_3743 | IR 93334:12-B-20-12-1-1RGA-2RGA-1-B-B  |
| 99  | MIB_3744 | IR 93334:13-B-9-12-15-1RGA-2RGA-1-B-B  |
| 100 | MIB_3769 | IR 93334:45-B-22-7-15-1RGA-2RGA-1-B-B  |
| 101 | MIB_3771 | IR 93334:47-B-23-16-12-1RGA-2RGA-1-B-B |
| 102 | MIB_3774 | IR 93334:50-B-12-21-5-1RGA-2RGA-1-B-B  |
| 103 | MIB_3776 | IR 93334:52-B-22-15-16-1RGA-2RGA-1-B-B |
| 104 | MIB_3785 | IR 93334:61-B-13-16-19-1RGA-2RGA-1-B-B |
| 105 | MIB_3789 | IR 93334:65-B-22-18-10-1RGA-2RGA-1-B-B |
| 106 | MIB_3795 | IR 93335:4-B-3-6-7-1RGA-2RGA-1-B-B     |
| 107 | MIB_3800 | IR 93335:10-B-12-16-9-1RGA-2RGA-1-B-B  |
| 108 | MIB_3801 | IR 93335:11-B-5-21-11-1RGA-2RGA-1-B-B  |
| 109 | MIB_3810 | IR 93335:21-B-20-23-8-1RGA-2RGA-1-B-B  |
| 110 | MIB_3811 | IR 93335:22-B-12-13-13-1RGA-2RGA-1-B-B |
| 111 | MIB_3815 | IR 93335:26-B-9-20-3-1RGA-2RGA-1-B-B   |
| 112 | MIB_3819 | IR 93335:30-B-13-3-11-1RGA-2RGA-1-B-B  |
| 113 | MIB_3821 | IR 93335:32-B-16-20-13-1RGA-2RGA-1-B-B |
| 114 | MIB_3823 | IR 93335:34-B-13-8-16-1RGA-2RGA-1-B-B  |
| 115 | MIB_3826 | IR 93335:37-B-3-3-13-1RGA-2RGA-1-B-B   |
| 116 | MIB_3828 | IR 93335:39-B-4-8-3-1RGA-2RGA-1-B-B    |
| 117 | MIB_3830 | IR 93335:41-B-10-9-4-1RGA-2RGA-1-B-B   |
| 118 | MIB_3831 | IR 93335:42-B-21-11-8-1RGA-2RGA-1-B-B  |
| 119 | MIB_3836 | IR 93335:48-B-15-5-15-1RGA-2RGA-1-B-B  |
| 120 | MIB_3838 | IR 93335:51-B-9-8-10-1RGA-2RGA-1-B-B   |
| 121 | MIB_3840 | IR 93335:54-B-4-20-8-1RGA-2RGA-1-B-B   |

|     |          |                                        |
|-----|----------|----------------------------------------|
| 122 | MIB_3846 | IR 93335:60-B-17-12-19-1RGA-2RGA-1-B-B |
| 123 | MIB_3850 | IR 93335:64-B-14-14-9-1RGA-2RGA-1-B-B  |
| 124 | MIB_3852 | IR 93335:66-B-17-17-14-1RGA-2RGA-1-B-B |
| 125 | MIB_3853 | IR 93336:1-B-13-3-24-1RGA-2RGA-1-B-B   |
| 126 | MIB_3865 | IR 93336:15-B-10-9-18-1RGA-2RGA-1-B-B  |
| 127 | MIB_3868 | IR 93336:18-B-6-4-14-1RGA-2RGA-1-B-B   |
| 128 | MIB_3872 | IR 93336:23-B-15-21-6-1RGA-2RGA-1-B-B  |
| 129 | MIB_3873 | IR 93336:24-B-15-17-9-1RGA-2RGA-1-B-B  |
| 130 | MIB_3877 | IR 93336:28-B-14-14-15-1RGA-2RGA-1-B-B |
| 131 | MIB_3880 | IR 93336:31-B-16-23-6-1RGA-2RGA-1-B-B  |
| 132 | MIB_3897 | IR 93336:50-B-5-13-20-1RGA-2RGA-1-B-B  |
| 133 | MIB_3898 | IR 93336:51-B-20-10-6-1RGA-2RGA-1-B-B  |
| 134 | MIB_3901 | IR 93336:54-B-3-6-10-1RGA-2RGA-1-B-B   |
| 135 | MIB_3908 | IR 93336:61-B-3-19-7-1RGA-2RGA-1-B-B   |
| 136 | MIB_3910 | IR 93336:63-B-20-8-2-1RGA-2RGA-1-B-B   |
| 137 | MIB_3912 | IR 93336:65-B-3-14-10-1RGA-2RGA-1-B-B  |
| 138 | MIB_3917 | IR 93336:70-B-19-11-3-1RGA-2RGA-1-B-B  |
| 139 | MIB_3918 | IR 93337:1-B-18-8-20-1RGA-2RGA-1-B-B   |
| 140 | MIB_3920 | IR 93337:4-B-19-10-19-1RGA-2RGA-1-B-B  |
| 141 | MIB_3922 | IR 93337:8-B-12-15-19-1RGA-2RGA-1-B-B  |
| 142 | MIB_3924 | IR 93337:10-B-20-6-19-1RGA-2RGA-1-B-B  |
| 143 | MIB_3927 | IR 93337:13-B-19-10-16-1RGA-2RGA-1-B-B |
| 144 | MIB_3930 | IR 93337:16-B-11-22-20-1RGA-2RGA-1-B-B |
| 145 | MIB_3935 | IR 93337:22-B-20-2-11-1RGA-2RGA-1-B-B  |
| 146 | MIB_3939 | IR 93337:26-B-12-24-14-1RGA-2RGA-1-B-B |
| 147 | MIB_3941 | IR 93337:28-B-9-3-20-1RGA-2RGA-1-B-B   |
| 148 | MIB_3942 | IR 93337:29-B-20-3-21-1RGA-2RGA-1-B-B  |
| 149 | MIB_3944 | IR 93337:35-B-5-19-20-1RGA-2RGA-1-B-B  |
| 150 | MIB_3945 | IR 93337:36-B-14-20-13-1RGA-2RGA-1-B-B |
| 151 | MIB_3948 | IR 93337:39-B-10-19-17-1RGA-2RGA-1-B-B |
| 152 | MIB_3955 | IR 93337:48-B-18-20-13-1RGA-2RGA-1-B-B |
| 153 | MIB_3960 | IR 93337:53-B-21-11-15-1RGA-2RGA-1-B-B |
| 154 | MIB_3961 | IR 93337:54-B-18-18-18-1RGA-2RGA-1-B-B |
| 155 | MIB_3963 | IR 93337:56-B-20-20-20-1RGA-2RGA-1-B-B |
| 156 | MIB_3964 | IR 93337:57-B-8-14-5-1RGA-2RGA-1-B-B   |
| 157 | MIB_3966 | IR 93337:59-B-21-20-21-1RGA-2RGA-1-B-B |
| 158 | MIB_3967 | IR 93337:60-B-14-21-18-1RGA-2RGA-1-B-B |
| 159 | MIB_3969 | IR 93337:62-B-12-22-20-1RGA-2RGA-1-B-B |
| 160 | MIB_3980 | IR 93338:10-B-15-10-20-1RGA-2RGA-1-B-B |
| 161 | MIB_3984 | IR 93338:14-B-21-9-5-1RGA-2RGA-1-B-B   |
| 162 | MIB_3986 | IR 93338:16-B-14-15-15-1RGA-2RGA-1-B-B |

|     |          |                                        |
|-----|----------|----------------------------------------|
| 163 | MIB_3997 | IR 93338:31-B-9-14-18-1RGA-2RGA-1-B-B  |
| 164 | MIB_3999 | IR 93338:33-B-21-12-14-1RGA-2RGA-1-B-B |
| 165 | MIB_4002 | IR 93338:36-B-16-15-13-1RGA-2RGA-1-B-B |
| 166 | MIB_4015 | IR 93338:50-B-18-10-6-1RGA-2RGA-1-B-B  |
| 167 | MIB_4040 | IR 93339:13-B-23-6-22-1RGA-2RGA-1-B-B  |
| 168 | MIB_4046 | IR 93339:23-B-18-17-18-1RGA-2RGA-1-B-B |
| 169 | MIB_4049 | IR 93339:26-B-6-16-11-1RGA-2RGA-1-B-B  |
| 170 | MIB_4050 | IR 93339:27-B-11-21-13-1RGA-2RGA-1-B-B |
| 171 | MIB_4051 | IR 93339:28-B-2-18-3-1RGA-2RGA-1-B-B   |
| 172 | MIB_4053 | IR 93339:31-B-17-4-19-1RGA-2RGA-1-B-B  |
| 173 | MIB_4054 | IR 93339:32-B-23-12-18-1RGA-2RGA-1-B-B |
| 174 | MIB_4062 | IR 93339:42-B-20-19-10-1RGA-2RGA-1-B-B |
| 175 | MIB_4064 | IR 93339:44-B-8-22-3-1RGA-2RGA-1-B-B   |
| 176 | MIB_4070 | IR 93339:50-B-20-22-10-1RGA-2RGA-1-B-B |
| 177 | MIB_4071 | IR 93339:52-B-16-24-9-1RGA-2RGA-1-B-B  |
| 178 | MIB_4072 | IR 93339:53-B-8-23-8-1RGA-2RGA-1-B-B   |
| 179 | MIB_4074 | IR 93339:55-B-21-2-15-1RGA-2RGA-1-B-B  |
| 180 | MIB_4075 | IR 93339:56-B-16-5-13-1RGA-2RGA-1-B-B  |
| 181 | MIB_4077 | IR 93340:1-B-10-13-10-1RGA-2RGA-1-B-B  |
| 182 | MIB_4082 | IR 93340:6-B-20-18-12-1RGA-2RGA-1-B-B  |
| 183 | MIB_4083 | IR 93340:7-B-22-14-21-1RGA-2RGA-1-B-B  |
| 184 | MIB_4086 | IR 93340:10-B-11-11-10-1RGA-2RGA-1-B-B |
| 185 | MIB_4095 | IR 93340:19-B-13-16-11-1RGA-2RGA-1-B-B |
| 186 | MIB_4126 | IR 93340:60-B-4-5-19-1RGA-2RGA-1-B-B   |
| 187 | MIB_4127 | IR 93341:1-B-20-10-23-1RGA-2RGA-1-B-B  |
| 188 | MIB_4131 | IR 93341:9-B-19-10-4-1RGA-2RGA-1-B-B   |
| 189 | MIB_4134 | IR 93341:12-B-6-7-20-1RGA-2RGA-1-B-B   |
| 190 | MIB_4135 | IR 93341:13-B-2-21-21-1RGA-2RGA-1-B-B  |
| 191 | MIB_4136 | IR 93341:14-B-6-6-2-1RGA-2RGA-1-B-B    |
| 192 | MIB_4137 | IR 93341:16-B-10-11-3-1RGA-2RGA-1-B-B  |
| 193 | MIB_4142 | IR 93341:25-B-11-20-6-1RGA-2RGA-1-B-B  |
| 194 | MIB_4153 | IR 93341:37-B-20-22-3-1RGA-2RGA-1-B-B  |
| 195 | MIB_4154 | IR 93341:39-B-20-16-20-1RGA-2RGA-1-B-B |
| 196 | MIB_4159 | IR 93341:44-B-12-21-13-1RGA-2RGA-1-B-B |
| 197 | MIB_4160 | IR 93341:45-B-20-2-18-1RGA-2RGA-1-B-B  |
| 198 | MIB_4161 | IR 93341:46-B-18-21-18-1RGA-2RGA-1-B-B |
| 199 | MIB_4162 | IR 93341:48-B-10-12-20-1RGA-2RGA-1-B-B |
| 200 | MIB_4163 | IR 93341:49-B-9-13-9-1RGA-2RGA-1-B-B   |
| 201 | MIB_4164 | IR 93341:50-B-14-10-20-1RGA-2RGA-1-B-B |
| 202 | MIB_4167 | IR 93341:53-B-11-19-21-1RGA-2RGA-1-B-B |
| 203 | MIB_4169 | IR 93341:55-B-18-2-12-1RGA-2RGA-1-B-B  |

|     |          |                                        |
|-----|----------|----------------------------------------|
| 204 | MIB_4172 | IR 93341:59-B-3-13-10-1RGA-2RGA-1-B-B  |
| 205 | MIB_4173 | IR 93341:60-B-8-9-9-1RGA-2RGA-1-B-B    |
| 206 | MIB_4176 | IR 93342:3-B-4-5-20-1RGA-2RGA-1-B-B    |
| 207 | MIB_4179 | IR 93342:6-B-6-3-18-1RGA-2RGA-1-B-B    |
| 208 | MIB_4180 | IR 93342:7-B-7-10-23-1RGA-2RGA-1-B-B   |
| 209 | MIB_4184 | IR 93342:11-B-11-7-8-1RGA-2RGA-1-B-B   |
| 210 | MIB_4188 | IR 93342:15-B-23-18-22-1RGA-2RGA-1-B-B |
| 211 | MIB_4190 | IR 93342:17-B-7-20-8-1RGA-2RGA-1-B-B   |
| 212 | MIB_4193 | IR 93342:20-B-7-20-7-1RGA-2RGA-1-B-B   |
| 213 | MIB_4195 | IR 93342:22-B-23-21-17-1RGA-2RGA-1-B-B |
| 214 | MIB_4198 | IR 93342:25-B-10-20-6-1RGA-2RGA-1-B-B  |
| 215 | MIB_4199 | IR 93342:26-B-8-18-20-1RGA-2RGA-1-B-B  |
| 216 | MIB_4203 | IR 93342:32-B-18-14-9-1RGA-2RGA-1-B-B  |
| 217 | MIB_4204 | IR 93342:33-B-19-22-7-1RGA-2RGA-1-B-B  |
| 218 | MIB_4208 | IR 93342:37-B-21-18-8-1RGA-2RGA-1-B-B  |
| 219 | MIB_4209 | IR 93342:38-B-18-23-10-1RGA-2RGA-1-B-B |
| 220 | MIB_4220 | IR 93343:11-B-8-7-20-1RGA-2RGA-1-B-B   |
| 221 | MIB_4223 | IR 93343:14-B-12-5-20-1RGA-2RGA-1-B-B  |
| 222 | MIB_4224 | IR 93343:15-B-9-11-16-1RGA-2RGA-1-B-B  |
| 223 | MIB_4228 | IR 93343:19-B-12-23-19-1RGA-2RGA-1-B-B |
| 224 | MIB_4233 | IR 93343:24-B-14-7-16-1RGA-2RGA-1-B-B  |
| 225 | MIB_4234 | IR 93343:25-B-18-5-8-1RGA-2RGA-1-B-B   |
| 226 | MIB_4235 | IR 93343:26-B-5-23-8-1RGA-2RGA-1-B-B   |
| 227 | MIB_4236 | IR 93343:27-B-14-19-12-1RGA-2RGA-1-B-B |
| 228 | MIB_4241 | IR 93343:32-B-13-8-17-1RGA-2RGA-1-B-B  |
| 229 | MIB_4251 | IR 93343:42-B-13-20-14-1RGA-2RGA-1-B-B |
| 230 | MIB_4252 | IR 93343:43-B-16-21-17-1RGA-2RGA-1-B-B |
| 231 | MIB_4261 | IR 93343:52-B-16-20-23-1RGA-2RGA-1-B-B |
| 232 | MIB_4265 | IR 93343:56-B-17-8-17-1RGA-2RGA-1-B-B  |
| 233 | MIB_4267 | IR 93343:58-B-11-12-16-1RGA-2RGA-1-B-B |
| 234 | MIB_4270 | IR 93344:3-B-6-13-17-1RGA-2RGA-1-B-B   |
| 235 | MIB_4274 | IR 93344:7-B-8-19-16-1RGA-2RGA-1-B-B   |
| 236 | MIB_4279 | IR 93344:12-B-3-14-6-1RGA-2RGA-1-B-B   |
| 237 | MIB_4280 | IR 93344:13-B-4-17-11-1RGA-2RGA-1-B-B  |
| 238 | MIB_4286 | IR 93344:21-B-3-23-7-1RGA-2RGA-1-B-B   |
| 239 | MIB_4287 | IR 93344:22-B-3-23-8-1RGA-2RGA-1-B-B   |
| 240 | MIB_4288 | IR 93344:23-B-16-22-8-1RGA-2RGA-1-B-B  |
| 241 | MIB_4289 | IR 93344:24-B-1-24-1-1RGA-2RGA-1-B-B   |
| 242 | MIB_4290 | IR 93344:25-B-20-10-20-1RGA-2RGA-1-B-B |
| 243 | MIB_4295 | IR 93345:1-B-16-3-12-1RGA-2RGA-1-B-B   |
| 244 | MIB_4299 | IR 93345:6-B-21-21-6-1RGA-2RGA-1-B-B   |

|     |          |                                        |
|-----|----------|----------------------------------------|
| 245 | MIB_4302 | IR 93345:10-B-4-23-16-1RGA-2RGA-1-B-B  |
| 246 | MIB_4305 | IR 93345:13-B-8-17-11-1RGA-2RGA-1-B-B  |
| 247 | MIB_4309 | IR 93345:17-B-6-22-16-1RGA-2RGA-1-B-B  |
| 248 | MIB_4316 | IR 93345:24-B-10-8-3-1RGA-2RGA-1-B-B   |
| 249 | MIB_4320 | IR 93345:28-B-9-18-6-1RGA-2RGA-1-B-B   |
| 250 | MIB_4322 | IR 93345:31-B-2-4-6-1RGA-2RGA-1-B-B    |
| 251 | MIB_4325 | IR 93346:2-B-5-9-8-1RGA-2RGA-1-B-B     |
| 252 | MIB_4328 | IR 93346:5-B-3-3-7-1RGA-2RGA-1-B-B     |
| 253 | MIB_4332 | IR 93346:10-B-2-11-14-1RGA-2RGA-1-B-B  |
| 254 | MIB_4338 | IR 93346:16-B-15-7-10-1RGA-2RGA-1-B-B  |
| 255 | MIB_4339 | IR 93346:17-B-7-2-6-1RGA-2RGA-1-B-B    |
| 256 | MIB_4340 | IR 93346:18-B-24-12-5-1RGA-2RGA-1-B-B  |
| 257 | MIB_4341 | IR 93346:19-B-7-21-13-1RGA-2RGA-1-B-B  |
| 258 | MIB_4345 | IR 93346:23-B-10-4-3-1RGA-2RGA-1-B-B   |
| 259 | MIB_4347 | IR 93346:25-B-7-6-18-1RGA-2RGA-1-B-B   |
| 260 | MIB_4348 | IR 93346:26-B-20-8-2-1RGA-2RGA-1-B-B   |
| 261 | MIB_4350 | IR 93346:28-B-19-6-2-1RGA-2RGA-1-B-B   |
| 262 | MIB_4352 | IR 93346:31-B-9-11-8-1RGA-2RGA-1-B-B   |
| 263 | MIB_4353 | IR 93346:33-B-10-8-18-1RGA-2RGA-1-B-B  |
| 264 | MIB_4354 | IR 93346:35-B-23-2-7-1RGA-2RGA-1-B-B   |
| 265 | MIB_4356 | IR 93347:1-B-8-4-7-1RGA-2RGA-1-B-B     |
| 266 | MIB_4357 | IR 93347:2-B-10-14-4-1RGA-2RGA-1-B-B   |
| 267 | MIB_4358 | IR 93347:3-B-11-4-10-1RGA-2RGA-1-B-B   |
| 268 | MIB_4359 | IR 93347:4-B-9-9-22-1RGA-2RGA-1-B-B    |
| 269 | MIB_4360 | IR 93347:5-B-7-3-10-1RGA-2RGA-1-B-B    |
| 270 | MIB_4361 | IR 93347:6-B-21-5-6-1RGA-2RGA-1-B-B    |
| 271 | MIB_4363 | IR 93347:8-B-12-10-20-1RGA-2RGA-1-B-B  |
| 272 | MIB_4365 | IR 93347:10-B-23-5-19-1RGA-2RGA-1-B-B  |
| 273 | MIB_4367 | IR 93347:12-B-3-5-8-1RGA-2RGA-1-B-B    |
| 274 | MIB_4369 | IR 93347:14-B-8-3-22-1RGA-2RGA-1-B-B   |
| 275 | MIB_4370 | IR 93347:15-B-14-3-10-1RGA-2RGA-1-B-B  |
| 276 | MIB_4372 | IR 93347:17-B-4-18-23-1RGA-2RGA-1-B-B  |
| 277 | MIB_4374 | IR 93347:19-B-3-2-21-1RGA-2RGA-1-B-B   |
| 278 | MIB_4376 | IR 93347:21-B-7-7-5-1RGA-2RGA-1-B-B    |
| 279 | MIB_4379 | IR 93348:1-B-21-18-9-1RGA-2RGA-1-B-B   |
| 280 | MIB_4383 | IR 93348:5-B-11-8-12-1RGA-2RGA-1-B-B   |
| 281 | MIB_4388 | IR 93348:10-B-5-10-11-1RGA-2RGA-1-B-B  |
| 282 | MIB_4389 | IR 93348:11-B-5-22-8-1RGA-2RGA-1-B-B   |
| 283 | MIB_4393 | IR 93348:15-B-16-20-21-1RGA-2RGA-1-B-B |
| 284 | MIB_4395 | IR 93348:17-B-19-19-8-1RGA-2RGA-1-B-B  |
| 285 | MIB_4410 | IR 93348:32-B-15-9-5-1RGA-2RGA-1-B-B   |

|     |          |                                        |
|-----|----------|----------------------------------------|
| 286 | MIB_4411 | IR 93348:34-B-22-21-14-1RGA-2RGA-1-B-B |
| 287 | MIB_4414 | IR 93348:37-B-19-2-19-1RGA-2RGA-1-B-B  |
| 288 | MIB_4417 | IR 93348:43-B-1-14-13-1RGA-2RGA-1-B-B  |
| 289 | MIB_4418 | IR 93348:44-B-6-4-22-1RGA-2RGA-1-B-B   |
| 290 | MIB_4424 | IR 93349:4-B-11-21-22-1RGA-2RGA-1-B-B  |
| 291 | MIB_4432 | IR 93349:12-B-5-5-19-1RGA-2RGA-1-B-B   |
| 292 | MIB_4433 | IR 93349:13-B-8-5-4-1RGA-2RGA-1-B-B    |
| 293 | MIB_4434 | IR 93349:14-B-6-5-4-1RGA-2RGA-1-B-B    |
| 294 | MIB_4438 | IR 93349:18-B-21-16-1-1RGA-2RGA-1-B-B  |
| 295 | MIB_4439 | IR 93349:19-B-8-19-6-1RGA-2RGA-1-B-B   |
| 296 | MIB_4445 | IR 93349:27-B-23-6-20-1RGA-2RGA-1-B-B  |
| 297 | MIB_4447 | IR 93349:30-B-6-20-10-1RGA-2RGA-1-B-B  |
| 298 | MIB_4448 | IR 93349:31-B-4-11-21-1RGA-2RGA-1-B-B  |
| 299 | MIB_4449 | IR 93349:32-B-9-4-8-1RGA-2RGA-1-B-B    |
| 300 | MIB_4450 | IR 93349:33-B-19-12-7-1RGA-2RGA-1-B-B  |
| 301 | MIB_4454 | IR 93349:37-B-23-19-8-1RGA-2RGA-1-B-B  |
| 302 | MIB_4455 | IR 93349:38-B-16-15-6-1RGA-2RGA-1-B-B  |
| 303 | MIB_4456 | IR 93349:39-B-8-7-22-1RGA-2RGA-1-B-B   |
| 304 | MIB_4462 | IR 93349:46-B-16-2-4-1RGA-2RGA-1-B-B   |
| 305 | MIB_4465 | IR 93349:49-B-7-1-2-1RGA-2RGA-1-B-B    |
| 306 | MIB_4467 | IR 93349:51-B-18-12-23-1RGA-2RGA-1-B-B |
| 307 | MIB_4472 | IR 93350:1-B-17-5-19-1RGA-2RGA-1-B-B   |
| 308 | MIB_4473 | IR 93350:2-B-21-20-23-1RGA-2RGA-1-B-B  |
| 309 | MIB_4474 | IR 93350:3-B-4-11-21-1RGA-2RGA-1-B-B   |
| 310 | MIB_4479 | IR 93350:8-B-8-7-23-1RGA-2RGA-1-B-B    |
| 311 | MIB_4481 | IR 93350:10-B-2-7-9-1RGA-2RGA-1-B-B    |
| 312 | MIB_4482 | IR 93350:11-B-2-5-18-1RGA-2RGA-1-B-B   |
| 313 | MIB_4485 | IR 93350:14-B-8-22-16-1RGA-2RGA-1-B-B  |
| 314 | MIB_4488 | IR 93350:17-B-9-21-7-1RGA-2RGA-1-B-B   |
| 315 | MIB_4489 | IR 93350:18-B-13-8-12-1RGA-2RGA-1-B-B  |
| 316 | MIB_4493 | IR 93350:22-B-18-22-12-1RGA-2RGA-1-B-B |
| 317 | MIB_4497 | IR 93350:26-B-12-23-21-1RGA-2RGA-1-B-B |
| 318 | MIB_4502 | IR 93350:31-B-21-9-21-1RGA-2RGA-1-B-B  |
| 319 | MIB_4506 | IR 93350:35-B-14-19-2-1RGA-2RGA-1-B-B  |
| 320 | MIB_4507 | IR 93350:36-B-10-23-9-1RGA-2RGA-1-B-B  |
| 321 | MIB_4508 | IR 93350:37-B-10-16-4-1RGA-2RGA-1-B-B  |
| 322 | MIB_4514 | IR 93350:43-B-23-16-12-1RGA-2RGA-1-B-B |
| 323 | MIB_4516 | IR 93350:45-B-23-16-15-1RGA-2RGA-1-B-B |
| 324 | MIB_4518 | IR 93350:47-B-10-23-7-1RGA-2RGA-1-B-B  |
| 325 | MIB_4520 | IR 93350:49-B-24-12-14-1RGA-2RGA-1-B-B |
| 326 | MIB_4524 | IR 93351:1-B-2-12-8-1RGA-2RGA-1-B-B    |



|     |          |                                        |
|-----|----------|----------------------------------------|
| 327 | MIB_4529 | IR 93351:6-B-7-4-7-1RGA-2RGA-1-B-B     |
| 328 | MIB_4532 | IR 93351:9-B-6-5-10-1RGA-2RGA-1-B-B    |
| 329 | MIB_4538 | IR 93352:5-B-20-9-23-1RGA-2RGA-1-B-B   |
| 330 | MIB_4543 | IR 93353:5-B-9-9-23-1RGA-2RGA-1-B-B    |
| 331 | MIB_4545 | IR 93353:7-B-1-12-19-1RGA-2RGA-1-B-B   |
| 332 | MIB_4546 | IR 93353:8-B-1-5-9-1RGA-2RGA-1-B-B     |
| 333 | MIB_4551 | IR 93353:13-B-17-14-24-1RGA-2RGA-1-B-B |
| 334 | MIB_4552 | IR 93353:14-B-8-12-8-1RGA-2RGA-1-B-B   |
| 335 | MIB_4553 | IR 93353:15-B-3-22-7-1RGA-2RGA-1-B-B   |
| 336 | MIB_4555 | IR 93353:17-B-18-8-12-1RGA-2RGA-1-B-B  |
| 337 | MIB_4556 | IR 93353:18-B-16-21-6-1RGA-2RGA-1-B-B  |
| 338 | MIB_4557 | IR 93353:19-B-21-21-2-1RGA-2RGA-1-B-B  |
| 339 | MIB_4562 | IR 93353:24-B-23-10-20-1RGA-2RGA-1-B-B |
| 340 | MIB_4566 | IR 93353:28-B-23-23-21-1RGA-2RGA-1-B-B |
| 341 | MIB_4570 | IR 93353:32-B-21-17-1-1RGA-2RGA-1-B-B  |
| 342 | MIB_4572 | IR 93353:34-B-17-7-19-1RGA-2RGA-1-B-B  |
| 343 | MIB_4576 | IR 93353:38-B-6-19-8-1RGA-2RGA-1-B-B   |
| 344 | MIB_4579 | IR 93353:41-B-20-2-18-1RGA-2RGA-1-B-B  |
| 345 | MIB_4585 | IR 93353:48-B-21-12-23-1RGA-2RGA-1-B-B |
| 346 | MIB_4588 | IR 93353:51-B-8-4-9-1RGA-2RGA-1-B-B    |
| 347 | MIB_4591 | IR 93353:54-B-12-7-22-1RGA-2RGA-1-B-B  |
| 348 | MIB_4596 | IR 93354:5-B-4-9-17-1RGA-2RGA-1-B-B    |
| 349 | MIB_4605 | IR 93354:14-B-9-8-6-1RGA-2RGA-1-B-B    |
| 350 | MIB_4606 | IR 93354:15-B-3-3-24-1RGA-2RGA-1-B-B   |
| 351 | MIB_4607 | IR 93354:16-B-13-21-19-1RGA-2RGA-1-B-B |
| 352 | MIB_4608 | IR 93354:17-B-5-18-17-1RGA-2RGA-1-B-B  |
| 353 | MIB_4609 | IR 93354:18-B-22-16-21-1RGA-2RGA-1-B-B |
| 354 | MIB_4611 | IR 93354:20-B-17-3-8-1RGA-2RGA-1-B-B   |
| 355 | MIB_4619 | IR 93354:28-B-19-23-14-1RGA-2RGA-1-B-B |
| 356 | MIB_4620 | IR 93354:29-B-5-7-9-1RGA-2RGA-1-B-B    |
| 357 | MIB_4623 | IR 93354:32-B-19-20-18-1RGA-2RGA-1-B-B |
| 358 | MIB_4627 | IR 93355:2-B-12-5-13-1RGA-2RGA-1-B-B   |
| 359 | MIB_4628 | IR 93355:3-B-12-20-8-1RGA-2RGA-1-B-B   |
| 360 | MIB_4632 | IR 93356:4-B-20-11-13-1RGA-2RGA-1-B-B  |
| 361 | MIB_4634 | IR 93356:6-B-11-6-22-1RGA-2RGA-1-B-B   |
| 362 | MIB_4635 | IR 93356:7-B-5-24-12-1RGA-2RGA-1-B-B   |
| 363 | MIB_4641 | IR 93356:13-B-8-8-2-1RGA-2RGA-1-B-B    |
| 364 | MIB_4642 | IR 93356:14-B-4-8-8-1RGA-2RGA-1-B-B    |
| 365 | MIB_4643 | IR 93356:15-B-3-19-11-1RGA-2RGA-1-B-B  |
| 366 | MIB_4648 | IR 93356:20-B-3-14-19-1RGA-2RGA-1-B-B  |
| 367 | MIB_4650 | IR 93356:23-B-8-6-18-1RGA-2RGA-1-B-B   |

|     |          |                                        |
|-----|----------|----------------------------------------|
| 368 | MIB_4651 | IR 93356:25-B-5-5-12-1RGA-2RGA-1-B-B   |
| 369 | MIB_4656 | IR 93356:31-B-3-12-20-1RGA-2RGA-1-B-B  |
| 370 | MIB_4660 | IR 93356:35-B-22-13-7-1RGA-2RGA-1-B-B  |
| 371 | MIB_4661 | IR 93356:36-B-3-5-19-1RGA-2RGA-1-B-B   |
| 372 | MIB_4665 | IR 93357:4-B-8-3-8-1RGA-2RGA-1-B-B     |
| 373 | MIB_4671 | IR 93357:10-B-13-11-2-1RGA-2RGA-1-B-B  |
| 374 | MIB_4672 | IR 93357:11-B-7-19-3-1RGA-2RGA-1-B-B   |
| 375 | MIB_4673 | IR 93357:12-B-5-5-20-1RGA-2RGA-1-B-B   |
| 376 | MIB_4674 | IR 93357:13-B-7-9-4-1RGA-2RGA-1-B-B    |
| 377 | MIB_4676 | IR 93357:15-B-8-19-2-1RGA-2RGA-1-B-B   |
| 378 | MIB_4679 | IR 93357:18-B-8-18-10-1RGA-2RGA-1-B-B  |
| 379 | MIB_4680 | IR 93358:1-B-12-6-4-1RGA-2RGA-1-B-B    |
| 380 | MIB_4682 | IR 93358:3-B-3-12-11-1RGA-2RGA-1-B-B   |
| 381 | MIB_4683 | IR 93358:4-B-21-4-3-1RGA-2RGA-1-B-B    |
| 382 | MIB_4691 | IR 93358:12-B-8-7-23-1RGA-2RGA-1-B-B   |
| 383 | MIB_4697 | IR 93358:18-B-8-4-7-1RGA-2RGA-1-B-B    |
| 384 | MIB_4699 | IR 93358:20-B-5-20-7-1RGA-2RGA-1-B-B   |
| 385 | MIB_4700 | IR 93358:21-B-3-16-5-1RGA-2RGA-1-B-B   |
| 386 | MIB_4701 | IR 93358:22-B-21-16-7-1RGA-2RGA-1-B-B  |
| 387 | MIB_4707 | IR 93358:28-B-22-2-12-1RGA-2RGA-1-B-B  |
| 388 | MIB_4712 | IR 93342:39-B-20-1-11-1RGA-2RGA-1-B-B  |
| 389 | MIB_4716 | IR 93335:68-B-11-13-22-1RGA-2RGA-1-B-B |
| 390 | MIB_4718 | IR 93336:72-B-15-4-8-1RGA-2RGA-1-B-B   |
| 391 | MIB_4719 | IR 93354:35-B-18-17-12-1RGA-2RGA-1-B-B |

**Supplementary Table S 2 : BPH resistance scores of 391 RiMi population across years**

| <b>S.No.</b> | <b>Entry</b> | <b>2016</b> | <b>2017</b> | <b>Mean over years</b> |
|--------------|--------------|-------------|-------------|------------------------|
| 1            | MIB_3400     | 9.0         | 9.0         | 9.0                    |
| 2            | MIB_3406     | 6.9         | 7.1         | 7.0                    |
| 3            | MIB_3408     | 8.2         | 8.4         | 8.3                    |
| 4            | MIB_3409     | 2.8         | 2.2         | 2.5                    |
| 5            | MIB_3414     | 8.1         | 7.9         | 8.0                    |
| 6            | MIB_3415     | 8.4         | 8.3         | 8.3                    |
| 7            | MIB_3416     | 9.0         | 9.0         | 9.0                    |
| 8            | MIB_3417     | 8.6         | 8.6         | 8.6                    |
| 9            | MIB_3419     | 8.3         | 8.1         | 8.2                    |
| 10           | MIB_3421     | 7.1         | 6.9         | 7.0                    |
| 11           | MIB_3422     | 7.8         | 7.7         | 7.8                    |
| 12           | MIB_3423     | 7.6         | 7.5         | 7.5                    |
| 13           | MIB_3427     | 9.0         | 9.0         | 9.0                    |
| 14           | MIB_3432     | 8.4         | 8.2         | 8.3                    |
| 15           | MIB_3434     | 8.5         | 8.2         | 8.3                    |
| 16           | MIB_3438     | 9.0         | 9.0         | 9.0                    |
| 17           | MIB_3439     | 9.0         | 9.0         | 9.0                    |
| 18           | MIB_3441     | 8.4         | 8.3         | 8.4                    |
| 19           | MIB_3442     | 9.0         | 9.0         | 9.0                    |
| 20           | MIB_3446     | 9.0         | 9.0         | 9.0                    |
| 21           | MIB_3448     | 8.8         | 8.8         | 8.8                    |
| 22           | MIB_3450     | 9.0         | 9.0         | 9.0                    |
| 23           | MIB_3453     | 9.0         | 9.0         | 9.0                    |
| 24           | MIB_3456     | 9.0         | 9.0         | 9.0                    |
| 25           | MIB_3457     | 9.0         | 9.0         | 9.0                    |
| 26           | MIB_3466     | 9.0         | 9.0         | 9.0                    |
| 27           | MIB_3467     | 9.0         | 9.0         | 9.0                    |
| 28           | MIB_3469     | 9.0         | 9.0         | 9.0                    |
| 29           | MIB_3471     | 9.0         | 9.0         | 9.0                    |
| 30           | MIB_3474     | 9.0         | 9.0         | 9.0                    |
| 31           | MIB_3475     | 9.0         | 9.0         | 9.0                    |
| 32           | MIB_3476     | 9.0         | 9.0         | 9.0                    |
| 33           | MIB_3477     | 9.0         | 9.0         | 9.0                    |
| 34           | MIB_3478     | 9.0         | 9.0         | 9.0                    |
| 35           | MIB_3479     | 9.0         | 9.0         | 9.0                    |
| 36           | MIB_3480     | 9.0         | 9.0         | 9.0                    |
| 37           | MIB_3481     | 9.0         | 9.0         | 9.0                    |
| 38           | MIB_3483     | 9.0         | 9.0         | 9.0                    |
| 39           | MIB_3484     | 9.0         | 9.0         | 9.0                    |

|    |          |     |     |     |
|----|----------|-----|-----|-----|
| 40 | MIB_3487 | 9.0 | 9.0 | 9.0 |
| 41 | MIB_3488 | 6.7 | 6.5 | 6.6 |
| 42 | MIB_3494 | 7.4 | 7.2 | 7.3 |
| 43 | MIB_3495 | 7.1 | 7.0 | 7.0 |
| 44 | MIB_3496 | 7.1 | 6.9 | 7.0 |
| 45 | MIB_3503 | 8.4 | 8.2 | 8.3 |
| 46 | MIB_3504 | 8.6 | 8.6 | 8.6 |
| 47 | MIB_3505 | 9.0 | 9.0 | 9.0 |
| 48 | MIB_3506 | 8.5 | 8.5 | 8.5 |
| 49 | MIB_3507 | 8.2 | 8.0 | 8.1 |
| 50 | MIB_3508 | 9.0 | 9.0 | 9.0 |
| 51 | MIB_3525 | 7.8 | 7.6 | 7.7 |
| 52 | MIB_3532 | 8.4 | 8.3 | 8.3 |
| 53 | MIB_3535 | 7.8 | 7.7 | 7.7 |
| 54 | MIB_3538 | 7.3 | 7.2 | 7.2 |
| 55 | MIB_3539 | 7.9 | 7.7 | 7.8 |
| 56 | MIB_3540 | 7.5 | 7.3 | 7.4 |
| 57 | MIB_3546 | 5.5 | 5.4 | 5.5 |
| 58 | MIB_3548 | 7.5 | 7.4 | 7.4 |
| 59 | MIB_3549 | 8.5 | 8.5 | 8.5 |
| 60 | MIB_3553 | 5.5 | 5.3 | 5.4 |
| 61 | MIB_3554 | 4.0 | 2.8 | 3.4 |
| 62 | MIB_3556 | 6.0 | 6.4 | 6.2 |
| 63 | MIB_3572 | 8.4 | 8.2 | 8.3 |
| 64 | MIB_3573 | 8.0 | 7.9 | 7.9 |
| 65 | MIB_3594 | 7.2 | 7.1 | 7.2 |
| 66 | MIB_3595 | 7.2 | 7.0 | 7.1 |
| 67 | MIB_3598 | 6.2 | 6.0 | 6.1 |
| 68 | MIB_3603 | 7.1 | 7.0 | 7.1 |
| 69 | MIB_3604 | 6.1 | 6.1 | 6.1 |
| 70 | MIB_3606 | 5.7 | 5.7 | 5.7 |
| 71 | MIB_3620 | 7.2 | 7.1 | 7.1 |
| 72 | MIB_3621 | 7.1 | 6.9 | 7.0 |
| 73 | MIB_3626 | 8.1 | 8.0 | 8.1 |
| 74 | MIB_3629 | 9.0 | 9.0 | 9.0 |
| 75 | MIB_3630 | 6.9 | 6.8 | 6.9 |
| 76 | MIB_3636 | 9.0 | 9.0 | 9.0 |
| 77 | MIB_3637 | 7.4 | 7.3 | 7.3 |
| 78 | MIB_3644 | 7.1 | 7.0 | 7.0 |
| 79 | MIB_3645 | 7.1 | 6.9 | 7.0 |
| 80 | MIB_3668 | 3.4 | 3.0 | 3.2 |

|     |          |     |     |     |
|-----|----------|-----|-----|-----|
| 81  | MIB_3669 | 9.0 | 9.0 | 9.0 |
| 82  | MIB_3672 | 9.0 | 9.0 | 9.0 |
| 83  | MIB_3675 | 9.0 | 9.0 | 9.0 |
| 84  | MIB_3677 | 9.0 | 9.0 | 9.0 |
| 85  | MIB_3686 | 9.0 | 9.0 | 9.0 |
| 86  | MIB_3688 | 9.0 | 9.0 | 9.0 |
| 87  | MIB_3691 | 9.0 | 9.0 | 9.0 |
| 88  | MIB_3693 | 1.6 | 1.6 | 1.6 |
| 89  | MIB_3695 | 9.0 | 9.0 | 9.0 |
| 90  | MIB_3707 | 6.4 | 5.2 | 5.8 |
| 91  | MIB_3708 | 8.1 | 7.9 | 8.0 |
| 92  | MIB_3726 | 7.3 | 7.1 | 7.2 |
| 93  | MIB_3728 | 9.0 | 9.0 | 9.0 |
| 94  | MIB_3732 | 9.0 | 9.0 | 9.0 |
| 95  | MIB_3737 | 9.0 | 9.0 | 9.0 |
| 96  | MIB_3739 | 9.0 | 9.0 | 9.0 |
| 97  | MIB_3742 | 9.0 | 9.0 | 9.0 |
| 98  | MIB_3743 | 9.0 | 9.0 | 9.0 |
| 99  | MIB_3744 | 9.0 | 9.0 | 9.0 |
| 100 | MIB_3769 | 9.0 | 9.0 | 9.0 |
| 101 | MIB_3771 | 9.0 | 9.0 | 9.0 |
| 102 | MIB_3774 | 9.0 | 9.0 | 9.0 |
| 103 | MIB_3776 | 8.4 | 8.3 | 8.4 |
| 104 | MIB_3785 | 8.2 | 8.1 | 8.2 |
| 105 | MIB_3789 | 8.7 | 8.7 | 8.7 |
| 106 | MIB_3795 | 8.5 | 8.5 | 8.5 |
| 107 | MIB_3800 | 8.8 | 8.8 | 8.8 |
| 108 | MIB_3801 | 9.0 | 9.0 | 9.0 |
| 109 | MIB_3810 | 7.4 | 7.2 | 7.3 |
| 110 | MIB_3811 | 8.8 | 8.8 | 8.8 |
| 111 | MIB_3815 | 8.2 | 8.0 | 8.1 |
| 112 | MIB_3819 | 7.3 | 7.2 | 7.3 |
| 113 | MIB_3821 | 7.7 | 7.5 | 7.6 |
| 114 | MIB_3823 | 8.2 | 8.1 | 8.1 |
| 115 | MIB_3826 | 8.5 | 8.5 | 8.5 |
| 116 | MIB_3828 | 9.0 | 9.0 | 9.0 |
| 117 | MIB_3830 | 9.0 | 9.0 | 9.0 |
| 118 | MIB_3831 | 9.0 | 9.0 | 9.0 |
| 119 | MIB_3836 | 9.0 | 9.0 | 9.0 |
| 120 | MIB_3838 | 9.0 | 9.0 | 9.0 |
| 121 | MIB_3840 | 7.8 | 7.6 | 7.7 |

|     |          |     |     |     |
|-----|----------|-----|-----|-----|
| 122 | MIB_3846 | 7.5 | 7.3 | 7.4 |
| 123 | MIB_3850 | 2.4 | 2.4 | 2.4 |
| 124 | MIB_3852 | 8.6 | 8.6 | 8.6 |
| 125 | MIB_3853 | 9.0 | 9.0 | 9.0 |
| 126 | MIB_3865 | 8.4 | 8.2 | 8.3 |
| 127 | MIB_3868 | 7.6 | 7.4 | 7.5 |
| 128 | MIB_3872 | 7.3 | 7.1 | 7.2 |
| 129 | MIB_3873 | 9.0 | 9.0 | 9.0 |
| 130 | MIB_3877 | 9.0 | 9.0 | 9.0 |
| 131 | MIB_3880 | 9.0 | 9.0 | 9.0 |
| 132 | MIB_3897 | 9.0 | 9.0 | 9.0 |
| 133 | MIB_3898 | 9.0 | 9.0 | 9.0 |
| 134 | MIB_3901 | 9.0 | 9.0 | 9.0 |
| 135 | MIB_3908 | 9.0 | 9.0 | 9.0 |
| 136 | MIB_3910 | 9.0 | 9.0 | 9.0 |
| 137 | MIB_3912 | 7.9 | 7.8 | 7.8 |
| 138 | MIB_3917 | 9.0 | 9.0 | 9.0 |
| 139 | MIB_3918 | 8.7 | 8.7 | 8.7 |
| 140 | MIB_3920 | 9.0 | 9.0 | 9.0 |
| 141 | MIB_3922 | 8.6 | 8.6 | 8.6 |
| 142 | MIB_3924 | 9.0 | 9.0 | 9.0 |
| 143 | MIB_3927 | 9.0 | 9.0 | 9.0 |
| 144 | MIB_3930 | 9.0 | 9.0 | 9.0 |
| 145 | MIB_3935 | 8.4 | 8.3 | 8.3 |
| 146 | MIB_3939 | 7.5 | 7.4 | 7.5 |
| 147 | MIB_3941 | 9.0 | 9.0 | 9.0 |
| 148 | MIB_3942 | 8.3 | 8.2 | 8.3 |
| 149 | MIB_3944 | 8.1 | 8.0 | 8.0 |
| 150 | MIB_3945 | 9.0 | 9.0 | 9.0 |
| 151 | MIB_3948 | 9.0 | 9.0 | 9.0 |
| 152 | MIB_3955 | 8.1 | 7.9 | 8.0 |
| 153 | MIB_3960 | 7.6 | 7.5 | 7.6 |
| 154 | MIB_3961 | 8.2 | 8.1 | 8.2 |
| 155 | MIB_3963 | 7.2 | 7.0 | 7.1 |
| 156 | MIB_3964 | 7.4 | 7.3 | 7.4 |
| 157 | MIB_3966 | 7.1 | 7.0 | 7.1 |
| 158 | MIB_3967 | 8.0 | 7.8 | 7.9 |
| 159 | MIB_3969 | 7.1 | 6.9 | 7.0 |
| 160 | MIB_3980 | 8.1 | 8.0 | 8.1 |
| 161 | MIB_3984 | 9.0 | 9.0 | 9.0 |
| 162 | MIB_3986 | 8.0 | 7.9 | 8.0 |

|     |          |     |     |     |
|-----|----------|-----|-----|-----|
| 163 | MIB_3997 | 8.7 | 8.7 | 8.7 |
| 164 | MIB_3999 | 7.2 | 7.1 | 7.2 |
| 165 | MIB_4002 | 8.4 | 8.2 | 8.3 |
| 166 | MIB_4015 | 8.1 | 7.9 | 8.0 |
| 167 | MIB_4040 | 9.0 | 9.0 | 9.0 |
| 168 | MIB_4046 | 8.7 | 8.7 | 8.7 |
| 169 | MIB_4049 | 9.0 | 9.0 | 9.0 |
| 170 | MIB_4050 | 9.0 | 9.0 | 9.0 |
| 171 | MIB_4051 | 7.4 | 7.2 | 7.3 |
| 172 | MIB_4053 | 8.2 | 8.0 | 8.1 |
| 173 | MIB_4054 | 7.3 | 7.2 | 7.2 |
| 174 | MIB_4062 | 5.6 | 5.4 | 5.5 |
| 175 | MIB_4064 | 8.7 | 8.7 | 8.7 |
| 176 | MIB_4070 | 7.8 | 7.7 | 7.8 |
| 177 | MIB_4071 | 7.5 | 7.3 | 7.4 |
| 178 | MIB_4072 | 3.6 | 3.6 | 3.6 |
| 179 | MIB_4074 | 8.3 | 8.1 | 8.2 |
| 180 | MIB_4075 | 6.9 | 6.7 | 6.8 |
| 181 | MIB_4077 | 2.2 | 1.3 | 1.7 |
| 182 | MIB_4082 | 6.2 | 6.1 | 6.2 |
| 183 | MIB_4083 | 7.9 | 7.7 | 7.8 |
| 184 | MIB_4086 | 6.3 | 6.2 | 6.3 |
| 185 | MIB_4095 | 5.7 | 5.6 | 5.6 |
| 186 | MIB_4126 | 4.4 | 3.8 | 4.1 |
| 187 | MIB_4127 | 6.2 | 6.0 | 6.1 |
| 188 | MIB_4131 | 4.0 | 3.5 | 3.7 |
| 189 | MIB_4134 | 3.2 | 2.1 | 2.6 |
| 190 | MIB_4135 | 5.5 | 5.3 | 5.4 |
| 191 | MIB_4136 | 6.6 | 6.4 | 6.5 |
| 192 | MIB_4137 | 6.2 | 6.1 | 6.1 |
| 193 | MIB_4142 | 5.4 | 5.3 | 5.3 |
| 194 | MIB_4153 | 7.2 | 7.0 | 7.1 |
| 195 | MIB_4154 | 5.9 | 5.8 | 5.8 |
| 196 | MIB_4159 | 8.5 | 8.5 | 8.5 |
| 197 | MIB_4160 | 9.0 | 9.0 | 9.0 |
| 198 | MIB_4161 | 8.2 | 8.1 | 8.1 |
| 199 | MIB_4162 | 6.5 | 6.4 | 6.4 |
| 200 | MIB_4163 | 4.1 | 4.1 | 4.1 |
| 201 | MIB_4164 | 5.8 | 5.7 | 5.7 |
| 202 | MIB_4167 | 5.6 | 5.5 | 5.6 |
| 203 | MIB_4169 | 7.7 | 7.6 | 7.7 |

|     |          |     |     |     |
|-----|----------|-----|-----|-----|
| 204 | MIB_4172 | 9.0 | 9.0 | 9.0 |
| 205 | MIB_4173 | 8.4 | 8.3 | 8.4 |
| 206 | MIB_4176 | 6.1 | 5.9 | 6.0 |
| 207 | MIB_4179 | 8.1 | 8.0 | 8.0 |
| 208 | MIB_4180 | 8.0 | 7.8 | 7.9 |
| 209 | MIB_4184 | 9.0 | 9.0 | 9.0 |
| 210 | MIB_4188 | 7.9 | 7.8 | 7.9 |
| 211 | MIB_4190 | 7.3 | 7.1 | 7.2 |
| 212 | MIB_4193 | 8.1 | 7.9 | 8.0 |
| 213 | MIB_4195 | 7.6 | 7.4 | 7.5 |
| 214 | MIB_4198 | 7.5 | 7.4 | 7.4 |
| 215 | MIB_4199 | 7.0 | 6.9 | 7.0 |
| 216 | MIB_4203 | 6.6 | 6.5 | 6.6 |
| 217 | MIB_4204 | 5.7 | 5.5 | 5.6 |
| 218 | MIB_4208 | 2.7 | 2.0 | 2.4 |
| 219 | MIB_4209 | 7.7 | 7.5 | 7.6 |
| 220 | MIB_4220 | 7.6 | 7.5 | 7.5 |
| 221 | MIB_4223 | 7.2 | 7.1 | 7.1 |
| 222 | MIB_4224 | 7.7 | 7.6 | 7.6 |
| 223 | MIB_4228 | 5.9 | 5.7 | 5.8 |
| 224 | MIB_4233 | 7.5 | 7.3 | 7.4 |
| 225 | MIB_4234 | 7.0 | 6.8 | 6.9 |
| 226 | MIB_4235 | 4.4 | 6.5 | 5.4 |
| 227 | MIB_4236 | 5.7 | 5.6 | 5.7 |
| 228 | MIB_4241 | 2.5 | 1.9 | 2.2 |
| 229 | MIB_4251 | 5.9 | 7.3 | 6.6 |
| 230 | MIB_4252 | 7.3 | 7.2 | 7.3 |
| 231 | MIB_4261 | 7.7 | 7.5 | 7.6 |
| 232 | MIB_4265 | 8.5 | 8.5 | 8.5 |
| 233 | MIB_4267 | 7.3 | 7.1 | 7.2 |
| 234 | MIB_4270 | 6.7 | 6.6 | 6.7 |
| 235 | MIB_4274 | 5.7 | 5.5 | 5.6 |
| 236 | MIB_4279 | 7.8 | 7.6 | 7.7 |
| 237 | MIB_4280 | 5.6 | 5.4 | 5.5 |
| 238 | MIB_4286 | 3.2 | 2.2 | 2.7 |
| 239 | MIB_4287 | 6.6 | 6.4 | 6.5 |
| 240 | MIB_4288 | 8.2 | 8.0 | 8.1 |
| 241 | MIB_4289 | 7.4 | 7.3 | 7.3 |
| 242 | MIB_4290 | 5.7 | 5.6 | 5.6 |
| 243 | MIB_4295 | 8.3 | 8.2 | 8.2 |
| 244 | MIB_4299 | 9.0 | 9.0 | 9.0 |



|     |          |     |     |     |
|-----|----------|-----|-----|-----|
| 245 | MIB_4302 | 8.3 | 8.1 | 8.2 |
| 246 | MIB_4305 | 8.5 | 8.5 | 8.5 |
| 247 | MIB_4309 | 9.0 | 9.0 | 9.0 |
| 248 | MIB_4316 | 8.7 | 8.7 | 8.7 |
| 249 | MIB_4320 | 6.4 | 7.9 | 7.2 |
| 250 | MIB_4322 | 9.0 | 9.0 | 9.0 |
| 251 | MIB_4325 | 8.2 | 8.1 | 8.2 |
| 252 | MIB_4328 | 9.0 | 9.0 | 9.0 |
| 253 | MIB_4332 | 8.3 | 8.2 | 8.3 |
| 254 | MIB_4338 | 9.0 | 9.0 | 9.0 |
| 255 | MIB_4339 | 8.9 | 8.9 | 8.9 |
| 256 | MIB_4340 | 8.3 | 8.1 | 8.2 |
| 257 | MIB_4341 | 8.4 | 8.2 | 8.3 |
| 258 | MIB_4345 | 9.0 | 9.0 | 9.0 |
| 259 | MIB_4347 | 7.0 | 6.8 | 6.9 |
| 260 | MIB_4348 | 8.6 | 8.6 | 8.6 |
| 261 | MIB_4350 | 9.0 | 9.0 | 9.0 |
| 262 | MIB_4352 | 8.4 | 8.8 | 8.6 |
| 263 | MIB_4353 | 9.0 | 8.6 | 8.8 |
| 264 | MIB_4354 | 8.1 | 8.0 | 8.1 |
| 265 | MIB_4356 | 8.1 | 7.9 | 8.0 |
| 266 | MIB_4357 | 7.6 | 7.4 | 7.5 |
| 267 | MIB_4358 | 5.2 | 5.1 | 5.2 |
| 268 | MIB_4359 | 7.5 | 7.4 | 7.5 |
| 269 | MIB_4360 | 8.7 | 8.7 | 8.7 |
| 270 | MIB_4361 | 6.2 | 6.0 | 6.1 |
| 271 | MIB_4363 | 8.3 | 8.2 | 8.2 |
| 272 | MIB_4365 | 8.7 | 8.7 | 8.7 |
| 273 | MIB_4367 | 3.0 | 3.0 | 3.0 |
| 274 | MIB_4369 | 8.7 | 8.7 | 8.7 |
| 275 | MIB_4370 | 2.6 | 1.8 | 2.2 |
| 276 | MIB_4372 | 9.0 | 9.0 | 9.0 |
| 277 | MIB_4374 | 7.2 | 7.0 | 7.1 |
| 278 | MIB_4376 | 6.2 | 6.1 | 6.2 |
| 279 | MIB_4379 | 5.8 | 5.6 | 5.7 |
| 280 | MIB_4383 | 5.9 | 5.8 | 5.9 |
| 281 | MIB_4388 | 4.7 | 4.9 | 4.8 |
| 282 | MIB_4389 | 5.7 | 5.7 | 5.7 |
| 283 | MIB_4393 | 2.0 | 0.8 | 1.4 |
| 284 | MIB_4395 | 5.4 | 5.2 | 5.3 |
| 285 | MIB_4410 | 6.2 | 7.4 | 6.8 |

|     |          |     |     |     |
|-----|----------|-----|-----|-----|
| 286 | MIB_4411 | 5.9 | 7.8 | 6.8 |
| 287 | MIB_4414 | 6.9 | 8.0 | 7.4 |
| 288 | MIB_4417 | 6.3 | 6.1 | 6.2 |
| 289 | MIB_4418 | 5.5 | 5.4 | 5.5 |
| 290 | MIB_4424 | 4.2 | 3.8 | 4.0 |
| 291 | MIB_4432 | 5.6 | 5.5 | 5.5 |
| 292 | MIB_4433 | 7.7 | 7.6 | 7.7 |
| 293 | MIB_4434 | 5.6 | 5.4 | 5.5 |
| 294 | MIB_4438 | 7.1 | 7.0 | 7.0 |
| 295 | MIB_4439 | 6.1 | 6.0 | 6.1 |
| 296 | MIB_4445 | 5.6 | 5.5 | 5.6 |
| 297 | MIB_4447 | 5.6 | 5.4 | 5.5 |
| 298 | MIB_4448 | 8.6 | 8.6 | 8.6 |
| 299 | MIB_4449 | 7.6 | 7.5 | 7.6 |
| 300 | MIB_4450 | 5.8 | 5.7 | 5.8 |
| 301 | MIB_4454 | 8.1 | 8.0 | 8.0 |
| 302 | MIB_4455 | 7.9 | 7.7 | 7.8 |
| 303 | MIB_4456 | 8.8 | 8.8 | 8.8 |
| 304 | MIB_4462 | 8.4 | 8.2 | 8.3 |
| 305 | MIB_4465 | 8.5 | 8.5 | 8.5 |
| 306 | MIB_4467 | 8.4 | 8.3 | 8.4 |
| 307 | MIB_4472 | 8.5 | 8.5 | 8.5 |
| 308 | MIB_4473 | 6.8 | 6.7 | 6.8 |
| 309 | MIB_4474 | 5.1 | 4.9 | 5.0 |
| 310 | MIB_4479 | 8.0 | 7.9 | 7.9 |
| 311 | MIB_4481 | 7.9 | 7.8 | 7.8 |
| 312 | MIB_4482 | 6.4 | 6.4 | 6.4 |
| 313 | MIB_4485 | 8.3 | 8.1 | 8.2 |
| 314 | MIB_4488 | 6.2 | 6.0 | 6.1 |
| 315 | MIB_4489 | 8.3 | 8.2 | 8.3 |
| 316 | MIB_4493 | 7.5 | 7.3 | 7.4 |
| 317 | MIB_4497 | 7.5 | 7.4 | 7.4 |
| 318 | MIB_4502 | 8.6 | 8.6 | 8.6 |
| 319 | MIB_4506 | 7.3 | 7.2 | 7.2 |
| 320 | MIB_4507 | 7.9 | 7.7 | 7.8 |
| 321 | MIB_4508 | 8.5 | 8.5 | 8.5 |
| 322 | MIB_4514 | 7.5 | 7.3 | 7.4 |
| 323 | MIB_4516 | 7.2 | 7.1 | 7.2 |
| 324 | MIB_4518 | 9.0 | 9.0 | 9.0 |
| 325 | MIB_4520 | 8.2 | 8.1 | 8.1 |
| 326 | MIB_4524 | 7.9 | 7.8 | 7.9 |

|     |          |     |     |     |
|-----|----------|-----|-----|-----|
| 327 | MIB_4529 | 8.3 | 8.1 | 8.2 |
| 328 | MIB_4532 | 8.5 | 8.5 | 8.5 |
| 329 | MIB_4538 | 8.5 | 8.5 | 8.5 |
| 330 | MIB_4543 | 8.4 | 8.2 | 8.3 |
| 331 | MIB_4545 | 6.0 | 5.8 | 5.9 |
| 332 | MIB_4546 | 7.9 | 7.7 | 7.8 |
| 333 | MIB_4551 | 9.0 | 9.0 | 9.0 |
| 334 | MIB_4552 | 8.1 | 7.9 | 8.0 |
| 335 | MIB_4553 | 8.4 | 8.3 | 8.3 |
| 336 | MIB_4555 | 7.2 | 7.0 | 7.1 |
| 337 | MIB_4556 | 8.0 | 7.8 | 7.9 |
| 338 | MIB_4557 | 5.4 | 5.3 | 5.4 |
| 339 | MIB_4562 | 6.7 | 6.5 | 6.6 |
| 340 | MIB_4566 | 6.3 | 6.2 | 6.2 |
| 341 | MIB_4570 | 2.1 | 1.8 | 1.9 |
| 342 | MIB_4572 | 8.8 | 8.8 | 8.8 |
| 343 | MIB_4576 | 7.8 | 7.7 | 7.7 |
| 344 | MIB_4579 | 6.8 | 6.6 | 6.7 |
| 345 | MIB_4585 | 7.5 | 7.4 | 7.5 |
| 346 | MIB_4588 | 7.1 | 6.9 | 7.0 |
| 347 | MIB_4591 | 7.9 | 7.8 | 7.8 |
| 348 | MIB_4596 | 7.9 | 7.7 | 7.8 |
| 349 | MIB_4605 | 8.8 | 8.8 | 8.8 |
| 350 | MIB_4606 | 6.2 | 6.1 | 6.1 |
| 351 | MIB_4607 | 9.0 | 9.0 | 9.0 |
| 352 | MIB_4608 | 7.2 | 7.1 | 7.1 |
| 353 | MIB_4609 | 8.7 | 8.7 | 8.7 |
| 354 | MIB_4611 | 8.5 | 8.5 | 8.5 |
| 355 | MIB_4619 | 2.9 | 2.0 | 2.5 |
| 356 | MIB_4620 | 7.4 | 7.2 | 7.3 |
| 357 | MIB_4623 | 5.4 | 5.2 | 5.3 |
| 358 | MIB_4627 | 4.1 | 4.1 | 4.1 |
| 359 | MIB_4628 | 7.4 | 7.3 | 7.4 |
| 360 | MIB_4632 | 5.9 | 5.7 | 5.8 |
| 361 | MIB_4634 | 5.2 | 5.2 | 5.2 |
| 362 | MIB_4635 | 8.0 | 7.9 | 8.0 |
| 363 | MIB_4641 | 7.4 | 7.2 | 7.3 |
| 364 | MIB_4642 | 5.5 | 5.7 | 5.6 |
| 365 | MIB_4643 | 6.5 | 8.2 | 7.3 |
| 366 | MIB_4648 | 6.7 | 6.6 | 6.6 |
| 367 | MIB_4650 | 9.0 | 9.0 | 9.0 |

|     |          |     |     |     |
|-----|----------|-----|-----|-----|
| 368 | MIB_4651 | 9.0 | 9.0 | 9.0 |
| 369 | MIB_4656 | 9.0 | 9.0 | 9.0 |
| 370 | MIB_4660 | 8.7 | 8.7 | 8.7 |
| 371 | MIB_4661 | 7.8 | 7.6 | 7.7 |
| 372 | MIB_4665 | 7.3 | 7.1 | 7.2 |
| 373 | MIB_4671 | 7.2 | 7.0 | 7.1 |
| 374 | MIB_4672 | 5.6 | 5.5 | 5.5 |
| 375 | MIB_4673 | 7.7 | 7.5 | 7.6 |
| 376 | MIB_4674 | 9.0 | 9.0 | 9.0 |
| 377 | MIB_4676 | 7.8 | 7.7 | 7.8 |
| 378 | MIB_4679 | 7.8 | 7.6 | 7.7 |
| 379 | MIB_4680 | 8.5 | 8.5 | 8.5 |
| 380 | MIB_4682 | 7.2 | 7.1 | 7.2 |
| 381 | MIB_4683 | 8.7 | 8.7 | 8.7 |
| 382 | MIB_4691 | 8.1 | 8.0 | 8.1 |
| 383 | MIB_4697 | 5.6 | 5.4 | 5.5 |
| 384 | MIB_4699 | 8.6 | 8.7 | 8.7 |
| 385 | MIB_4700 | 8.1 | 7.9 | 8.0 |
| 386 | MIB_4701 | 6.4 | 6.2 | 6.3 |
| 387 | MIB_4707 | 7.3 | 8.3 | 7.8 |
| 388 | MIB_4712 | 6.9 | 6.7 | 6.8 |
| 389 | MIB_4716 | 7.8 | 7.7 | 7.7 |
| 390 | MIB_4718 | 8.6 | 8.6 | 8.6 |
| 391 | MIB_4719 | 6.8 | 6.7 | 6.7 |

**Supplementary Table S 3: SNP trait associations identified by different single and multi locus GWAS models**

| GLM  |             |            |          |          | MLM  |             |            |          |          |
|------|-------------|------------|----------|----------|------|-------------|------------|----------|----------|
| S.No | SNP         | Chromosome | Position | P.value  | S.No | SNP         | Chromosome | Position | P.value  |
| 1    | S1_13264894 | 1          | 13264894 | 1.46E-05 | 1    | S1_13273091 | 1          | 13273091 | 0.000132 |
| 2    | S1_13273091 | 1          | 13273091 | 1.79E-05 | 2    | S1_13264894 | 1          | 13264894 | 0.000167 |
| 3    | S1_13274423 | 1          | 13274423 | 2.22E-05 | 3    | S1_13274423 | 1          | 13274423 | 0.000311 |
| 4    | S1_13374131 | 1          | 13374131 | 5.70E-05 | 4    | S1_13424589 | 1          | 13424589 | 0.000475 |
| 5    | S1_13365703 | 1          | 13365703 | 5.70E-05 | 5    | S1_13365703 | 1          | 13365703 | 0.000635 |
| 6    | S1_13374151 | 1          | 13374151 | 5.70E-05 | 6    | S1_13374151 | 1          | 13374151 | 0.000635 |
| 7    | S1_13898444 | 1          | 13898444 | 5.76E-05 | 7    | S1_13374131 | 1          | 13374131 | 0.000635 |
| 8    | S1_13424589 | 1          | 13424589 | 6.06E-05 | 8    | S1_12742211 | 1          | 12742211 | 0.000821 |
| 9    | S1_13316461 | 1          | 13316461 | 0.000117 | 9    | S1_13316461 | 1          | 13316461 | 0.001485 |
| 10   | S1_13333531 | 1          | 13333531 | 0.000117 | 10   | S1_13333531 | 1          | 13333531 | 0.001485 |
| 11   | S1_13323794 | 1          | 13323794 | 0.000117 | 11   | S1_13323794 | 1          | 13323794 | 0.001485 |
| 12   | S1_13541723 | 1          | 13541723 | 0.000147 | 12   | S1_12737403 | 1          | 12737403 | 0.001936 |
| 13   | S1_13541727 | 1          | 13541727 | 0.000147 | 13   | S2_34796411 | 2          | 34796411 | 0.001204 |
| 14   | S1_13541645 | 1          | 13541645 | 0.000147 | 14   | S4_4571354  | 4          | 4571354  | 0.000892 |
| 15   | S1_13776350 | 1          | 13776350 | 0.000151 | 15   | S4_5135455  | 4          | 5135455  | 0.001716 |
| 16   | S1_12742211 | 1          | 12742211 | 0.000169 | 16   | S5_642108   | 5          | 642108   | 5.14E-05 |
| 17   | S1_13542361 | 1          | 13542361 | 0.000262 | 17   | S5_23257108 | 5          | 23257108 | 0.001079 |
| 18   | S1_13542375 | 1          | 13542375 | 0.000262 | 18   | S5_23279042 | 5          | 23279042 | 0.001079 |
| 19   | S1_14099875 | 1          | 14099875 | 0.000264 | 19   | S5_23256042 | 5          | 23256042 | 0.001079 |
| 20   | S1_13956977 | 1          | 13956977 | 0.000302 | 20   | S5_23257107 | 5          | 23257107 | 0.001079 |
| 21   | S1_13563387 | 1          | 13563387 | 0.000392 | 21   | S5_23279024 | 5          | 23279024 | 0.001079 |
| 22   | S1_13567724 | 1          | 13567724 | 0.000452 | 22   | S5_649114   | 5          | 649114   | 0.001493 |
| 23   | S1_13567733 | 1          | 13567733 | 0.000452 | 23   | S5_786707   | 5          | 786707   | 0.00175  |
| 24   | S1_12737403 | 1          | 12737403 | 0.000474 | 24   | S5_23287785 | 5          | 23287785 | 0.001787 |
| 25   | S1_14102208 | 1          | 14102208 | 0.000646 | 25   | S5_23303726 | 5          | 23303726 | 0.001787 |
| 26   | S1_12704071 | 1          | 12704071 | 0.000747 | 26   | S5_23307521 | 5          | 23307521 | 0.001787 |

|    |             |   |          |          |    |             |   |          |          |
|----|-------------|---|----------|----------|----|-------------|---|----------|----------|
| 27 | S1_14060399 | 1 | 14060399 | 0.000799 | 27 | S5_23310970 | 5 | 23310970 | 0.001787 |
| 28 | S1_13541716 | 1 | 13541716 | 0.001794 | 28 | S5_23312204 | 5 | 23312204 | 0.001866 |
| 29 | S2_34796411 | 2 | 34796411 | 7.72E-05 | 29 | S5_23314218 | 5 | 23314218 | 0.001866 |
| 30 | S2_1525753  | 2 | 1525753  | 0.000451 | 30 | S6_8886408  | 6 | 8886408  | 2.56E-05 |
| 31 | S2_1525874  | 2 | 1525874  | 0.000451 | 31 | S6_8886434  | 6 | 8886434  | 2.56E-05 |
| 32 | S2_1517365  | 2 | 1517365  | 0.000451 | 32 | S6_8876610  | 6 | 8876610  | 8.03E-05 |
| 33 | S2_1531980  | 2 | 1531980  | 0.000669 | 33 | S6_8851568  | 6 | 8851568  | 8.03E-05 |
| 34 | S2_1344992  | 2 | 1344992  | 0.000959 | 34 | S6_8870236  | 6 | 8870236  | 8.03E-05 |
| 35 | S2_1550369  | 2 | 1550369  | 0.001441 | 35 | S6_8876540  | 6 | 8876540  | 8.03E-05 |
| 36 | S2_1548690  | 2 | 1548690  | 0.001441 | 36 | S6_8876586  | 6 | 8876586  | 8.03E-05 |
| 37 | S2_1553290  | 2 | 1553290  | 0.001441 | 37 | S6_8876606  | 6 | 8876606  | 8.03E-05 |
| 38 | S2_34784688 | 2 | 34784688 | 0.001506 | 38 | S6_8914650  | 6 | 8914650  | 0.000124 |
| 39 | S2_34791393 | 2 | 34791393 | 0.001506 | 39 | S6_8914671  | 6 | 8914671  | 0.000124 |
| 40 | S2_34791395 | 2 | 34791395 | 0.001506 | 40 | S6_8914769  | 6 | 8914769  | 0.000124 |
| 41 | S2_1039309  | 2 | 1039309  | 0.001528 | 41 | S6_8914643  | 6 | 8914643  | 0.000124 |
| 42 | S2_1416970  | 2 | 1416970  | 0.001603 | 42 | S6_8914651  | 6 | 8914651  | 0.000124 |
| 43 | S2_8165184  | 2 | 8165184  | 0.00163  | 43 | S6_8850552  | 6 | 8850552  | 0.000137 |
| 44 | S2_8165190  | 2 | 8165190  | 0.00163  | 44 | S6_9004225  | 6 | 9004225  | 0.000182 |
| 45 | S2_8165191  | 2 | 8165191  | 0.00163  | 45 | S6_8917933  | 6 | 8917933  | 0.000264 |
| 46 | S2_8165186  | 2 | 8165186  | 0.00163  | 46 | S6_8917936  | 6 | 8917936  | 0.000264 |
| 47 | S2_8165187  | 2 | 8165187  | 0.00163  | 47 | S6_8917962  | 6 | 8917962  | 0.000264 |
| 48 | S2_1564468  | 2 | 1564468  | 0.001717 | 48 | S6_8917185  | 6 | 8917185  | 0.000264 |
| 49 | S2_1570980  | 2 | 1570980  | 0.001717 | 49 | S6_8962742  | 6 | 8962742  | 0.000336 |
| 50 | S4_4571354  | 4 | 4571354  | 0.000104 | 50 | S6_8962796  | 6 | 8962796  | 0.000336 |
| 51 | S4_3469974  | 4 | 3469974  | 0.000468 | 51 | S6_8956202  | 6 | 8956202  | 0.000336 |
| 52 | S4_3419234  | 4 | 3419234  | 0.00084  | 52 | S6_9003844  | 6 | 9003844  | 0.000352 |
| 53 | S4_3411505  | 4 | 3411505  | 0.000863 | 53 | S6_9003866  | 6 | 9003866  | 0.000352 |
| 54 | S4_3411567  | 4 | 3411567  | 0.000863 | 54 | S6_6758215  | 6 | 6758215  | 0.000397 |
| 55 | S4_3411593  | 4 | 3411593  | 0.000863 | 55 | S6_8921201  | 6 | 8921201  | 0.000423 |
| 56 | S4_3411559  | 4 | 3411559  | 0.000863 | 56 | S6_8932488  | 6 | 8932488  | 0.000423 |

|    |             |   |          |          |    |              |    |          |          |
|----|-------------|---|----------|----------|----|--------------|----|----------|----------|
| 57 | S4_5135455  | 4 | 5135455  | 0.001496 | 57 | S6_8921200   | 6  | 8921200  | 0.000423 |
| 58 | S4_4521327  | 4 | 4521327  | 0.001557 | 58 | S6_6752461   | 6  | 6752461  | 0.000824 |
| 59 | S4_4541668  | 4 | 4541668  | 0.001768 | 59 | S6_6769492   | 6  | 6769492  | 0.000831 |
| 60 | S4_4541738  | 4 | 4541738  | 0.001768 | 60 | S6_7646336   | 6  | 7646336  | 0.000915 |
| 61 | S4_5076100  | 4 | 5076100  | 0.001855 | 61 | S6_8975500   | 6  | 8975500  | 0.000931 |
| 62 | S4_5006357  | 4 | 5006357  | 0.001873 | 62 | S6_8977107   | 6  | 8977107  | 0.000931 |
| 63 | S5_642108   | 5 | 642108   | 4.71E-06 | 63 | S6_8977116   | 6  | 8977116  | 0.000931 |
| 64 | S5_786707   | 5 | 786707   | 0.000242 | 64 | S6_8977156   | 6  | 8977156  | 0.000931 |
| 65 | S5_23256042 | 5 | 23256042 | 0.000279 | 65 | S6_8977190   | 6  | 8977190  | 0.000931 |
| 66 | S5_23257107 | 5 | 23257107 | 0.000279 | 66 | S6_6823579   | 6  | 6823579  | 0.001205 |
| 67 | S5_23279024 | 5 | 23279024 | 0.000279 | 67 | S6_6769526   | 6  | 6769526  | 0.00122  |
| 68 | S5_23257108 | 5 | 23257108 | 0.000279 | 68 | S6_6769533   | 6  | 6769533  | 0.00122  |
| 69 | S5_23279042 | 5 | 23279042 | 0.000279 | 69 | S6_7630128   | 6  | 7630128  | 0.001321 |
| 70 | S5_23287785 | 5 | 23287785 | 0.000506 | 70 | S6_7614974   | 6  | 7614974  | 0.001321 |
| 71 | S5_23303726 | 5 | 23303726 | 0.000506 | 71 | S6_7626543   | 6  | 7626543  | 0.001321 |
| 72 | S5_23307521 | 5 | 23307521 | 0.000506 | 72 | S6_8990795   | 6  | 8990795  | 0.001355 |
| 73 | S5_23310970 | 5 | 23310970 | 0.000506 | 73 | S6_6819248   | 6  | 6819248  | 0.0015   |
| 74 | S5_23408360 | 5 | 23408360 | 0.000525 | 74 | S6_7647695   | 6  | 7647695  | 0.001582 |
| 75 | S5_23417869 | 5 | 23417869 | 0.000525 | 75 | S6_7647706   | 6  | 7647706  | 0.001582 |
| 76 | S5_23426824 | 5 | 23426824 | 0.000525 | 76 | S6_8977712   | 6  | 8977712  | 0.001772 |
| 77 | S5_23433965 | 5 | 23433965 | 0.000525 | 77 | S6_7709724   | 6  | 7709724  | 0.001833 |
| 78 | S5_23436011 | 5 | 23436011 | 0.000525 | 78 | S6_9028593   | 6  | 9028593  | 0.001833 |
| 79 | S5_23443154 | 5 | 23443154 | 0.000525 | 79 | S10_18115531 | 10 | 18115531 | 0.000622 |
| 80 | S5_23467123 | 5 | 23467123 | 0.000525 | 80 | S10_18127881 | 10 | 18127881 | 0.001102 |
| 81 | S5_23497990 | 5 | 23497990 | 0.000525 | 81 | S10_18145180 | 10 | 18145180 | 0.001102 |
| 82 | S5_23504636 | 5 | 23504636 | 0.000525 | 82 | S10_18387130 | 10 | 18387130 | 0.001351 |
| 83 | S5_23508245 | 5 | 23508245 | 0.000525 | 83 | S10_18393744 | 10 | 18393744 | 0.001351 |
| 84 | S5_23509334 | 5 | 23509334 | 0.000525 | 84 | S10_18851296 | 10 | 18851296 | 0.001654 |
| 85 | S5_23434999 | 5 | 23434999 | 0.000525 | 85 | S10_18870300 | 10 | 18870300 | 0.001654 |
| 86 | S5_23448630 | 5 | 23448630 | 0.000525 | 86 | S10_18441292 | 10 | 18441292 | 0.00166  |

|     |             |   |          |          |    |              |    |          |          |
|-----|-------------|---|----------|----------|----|--------------|----|----------|----------|
| 87  | S5_23463399 | 5 | 23463399 | 0.000525 | 87 | S10_18402152 | 10 | 18402152 | 0.001803 |
| 88  | S5_23504663 | 5 | 23504663 | 0.000525 | 88 | S12_25336024 | 12 | 25336024 | 0.000585 |
| 89  | S5_23509333 | 5 | 23509333 | 0.000525 | 89 | S12_25336023 | 12 | 25336023 | 0.000585 |
| 90  | S5_23314218 | 5 | 23314218 | 0.000564 | 90 | S12_25343744 | 12 | 25343744 | 0.001566 |
| 91  | S5_23312204 | 5 | 23312204 | 0.000564 | 91 | S12_25343720 | 12 | 25343720 | 0.001566 |
| 92  | S5_23240418 | 5 | 23240418 | 0.000577 |    |              |    |          |          |
| 93  | S5_23249078 | 5 | 23249078 | 0.000577 |    |              |    |          |          |
| 94  | S5_23249237 | 5 | 23249237 | 0.000577 |    |              |    |          |          |
| 95  | S5_23249119 | 5 | 23249119 | 0.000577 |    |              |    |          |          |
| 96  | S5_23249125 | 5 | 23249125 | 0.000577 |    |              |    |          |          |
| 97  | S5_23249605 | 5 | 23249605 | 0.000577 |    |              |    |          |          |
| 98  | S5_649114   | 5 | 649114   | 0.000857 |    |              |    |          |          |
| 99  | S5_966011   | 5 | 966011   | 0.000943 |    |              |    |          |          |
| 100 | S5_23386585 | 5 | 23386585 | 0.001015 |    |              |    |          |          |
| 101 | S5_23386596 | 5 | 23386596 | 0.001015 |    |              |    |          |          |
| 102 | S5_23404379 | 5 | 23404379 | 0.001015 |    |              |    |          |          |
| 103 | S6_8886408  | 6 | 8886408  | 1.47E-06 |    |              |    |          |          |
| 104 | S6_8886434  | 6 | 8886434  | 1.47E-06 |    |              |    |          |          |
| 105 | S6_8876610  | 6 | 8876610  | 3.69E-06 |    |              |    |          |          |
| 106 | S6_8851568  | 6 | 8851568  | 3.69E-06 |    |              |    |          |          |
| 107 | S6_8870236  | 6 | 8870236  | 3.69E-06 |    |              |    |          |          |
| 108 | S6_8876540  | 6 | 8876540  | 3.69E-06 |    |              |    |          |          |
| 109 | S6_8876586  | 6 | 8876586  | 3.69E-06 |    |              |    |          |          |
| 110 | S6_8876606  | 6 | 8876606  | 3.69E-06 |    |              |    |          |          |
| 111 | S6_8850552  | 6 | 8850552  | 4.80E-06 |    |              |    |          |          |
| 112 | S6_8914650  | 6 | 8914650  | 6.13E-06 |    |              |    |          |          |
| 113 | S6_8914671  | 6 | 8914671  | 6.13E-06 |    |              |    |          |          |
| 114 | S6_8914769  | 6 | 8914769  | 6.13E-06 |    |              |    |          |          |
| 115 | S6_8914643  | 6 | 8914643  | 6.13E-06 |    |              |    |          |          |
| 116 | S6_8914651  | 6 | 8914651  | 6.13E-06 |    |              |    |          |          |



|     |            |   |         |          |
|-----|------------|---|---------|----------|
| 117 | S6_9004225 | 6 | 9004225 | 6.88E-06 |
| 118 | S6_8917933 | 6 | 8917933 | 1.03E-05 |
| 119 | S6_8917936 | 6 | 8917936 | 1.03E-05 |
| 120 | S6_8917962 | 6 | 8917962 | 1.03E-05 |
| 121 | S6_8917185 | 6 | 8917185 | 1.03E-05 |
| 122 | S6_9003844 | 6 | 9003844 | 1.26E-05 |
| 123 | S6_9003866 | 6 | 9003866 | 1.26E-05 |
| 124 | S6_8962742 | 6 | 8962742 | 1.38E-05 |
| 125 | S6_8962796 | 6 | 8962796 | 1.38E-05 |
| 126 | S6_8956202 | 6 | 8956202 | 1.38E-05 |
| 127 | S6_8921200 | 6 | 8921200 | 1.54E-05 |
| 128 | S6_8921201 | 6 | 8921201 | 1.54E-05 |
| 129 | S6_8932488 | 6 | 8932488 | 1.54E-05 |
| 130 | S6_8990795 | 6 | 8990795 | 2.97E-05 |
| 131 | S6_8975500 | 6 | 8975500 | 3.23E-05 |
| 132 | S6_8977107 | 6 | 8977107 | 3.23E-05 |
| 133 | S6_8977116 | 6 | 8977116 | 3.23E-05 |
| 134 | S6_8977156 | 6 | 8977156 | 3.23E-05 |
| 135 | S6_8977190 | 6 | 8977190 | 3.23E-05 |
| 136 | S6_6758215 | 6 | 6758215 | 3.87E-05 |
| 137 | S6_9028593 | 6 | 9028593 | 4.01E-05 |
| 138 | S6_8977712 | 6 | 8977712 | 4.75E-05 |
| 139 | S6_9043197 | 6 | 9043197 | 5.11E-05 |
| 140 | S6_8982135 | 6 | 8982135 | 5.82E-05 |
| 141 | S6_8977949 | 6 | 8977949 | 6.99E-05 |
| 142 | S6_8977972 | 6 | 8977972 | 6.99E-05 |
| 143 | S6_6752461 | 6 | 6752461 | 7.36E-05 |
| 144 | S6_6769492 | 6 | 6769492 | 7.90E-05 |
| 145 | S6_7709724 | 6 | 7709724 | 9.21E-05 |
| 146 | S6_7647695 | 6 | 7647695 | 0.000103 |

|     |            |   |         |          |
|-----|------------|---|---------|----------|
| 147 | S6_7647706 | 6 | 7647706 | 0.000103 |
| 148 | S6_7531094 | 6 | 7531094 | 0.000108 |
| 149 | S6_7557807 | 6 | 7557807 | 0.000108 |
| 150 | S6_7538495 | 6 | 7538495 | 0.000108 |
| 151 | S6_7542726 | 6 | 7542726 | 0.000108 |
| 152 | S6_6922808 | 6 | 6922808 | 0.000112 |
| 153 | S6_6819248 | 6 | 6819248 | 0.000118 |
| 154 | S6_6823579 | 6 | 6823579 | 0.000121 |
| 155 | S6_6769526 | 6 | 6769526 | 0.000132 |
| 156 | S6_6769533 | 6 | 6769533 | 0.000132 |
| 157 | S6_7646336 | 6 | 7646336 | 0.000156 |
| 158 | S6_7630128 | 6 | 7630128 | 0.00017  |
| 159 | S6_7614974 | 6 | 7614974 | 0.00017  |
| 160 | S6_7626543 | 6 | 7626543 | 0.00017  |
| 161 | S6_6916461 | 6 | 6916461 | 0.000264 |
| 162 | S6_7008351 | 6 | 7008351 | 0.000365 |
| 163 | S6_6996522 | 6 | 6996522 | 0.000365 |
| 164 | S6_7001492 | 6 | 7001492 | 0.000365 |
| 165 | S6_7045328 | 6 | 7045328 | 0.00057  |
| 166 | S6_7045355 | 6 | 7045355 | 0.00057  |
| 167 | S6_6697070 | 6 | 6697070 | 0.000606 |
| 168 | S6_7531433 | 6 | 7531433 | 0.000619 |
| 169 | S6_7531437 | 6 | 7531437 | 0.000619 |
| 170 | S6_7557905 | 6 | 7557905 | 0.000619 |
| 171 | S6_7581809 | 6 | 7581809 | 0.000628 |
| 172 | S6_6916223 | 6 | 6916223 | 0.000714 |
| 173 | S6_6535236 | 6 | 6535236 | 0.000758 |
| 174 | S6_6535237 | 6 | 6535237 | 0.000758 |
| 175 | S6_6916163 | 6 | 6916163 | 0.000761 |
| 176 | S6_6869009 | 6 | 6869009 | 0.000801 |

|     |             |   |          |          |
|-----|-------------|---|----------|----------|
| 177 | S6_8153078  | 6 | 8153078  | 0.00081  |
| 178 | S6_6924356  | 6 | 6924356  | 0.000924 |
| 179 | S6_6924359  | 6 | 6924359  | 0.000924 |
| 180 | S6_6934785  | 6 | 6934785  | 0.000924 |
| 181 | S6_6924352  | 6 | 6924352  | 0.000924 |
| 182 | S6_6924355  | 6 | 6924355  | 0.000924 |
| 183 | S6_6924358  | 6 | 6924358  | 0.000924 |
| 184 | S6_6924361  | 6 | 6924361  | 0.000924 |
| 185 | S6_27969065 | 6 | 27969065 | 0.001046 |
| 186 | S6_27969545 | 6 | 27969545 | 0.001046 |
| 187 | S6_7522397  | 6 | 7522397  | 0.001076 |
| 188 | S6_7094512  | 6 | 7094512  | 0.001266 |
| 189 | S6_6816739  | 6 | 6816739  | 0.001373 |
| 190 | S6_6513819  | 6 | 6513819  | 0.001585 |

| CMLM |             |            |          |          | SUPER |             |            |          |          |
|------|-------------|------------|----------|----------|-------|-------------|------------|----------|----------|
| S.No | SNP         | Chromosome | Position | P.value  | S.No  | SNP         | Chromosome | Position | P.value  |
| 1    | S1_13273091 | 1          | 13273091 | 0.00027  | 1     | S1_13264894 | 1          | 13264894 | 2.16E-05 |
| 2    | S1_13264894 | 1          | 13264894 | 0.000316 | 2     | S1_13273091 | 1          | 13273091 | 2.38E-05 |
| 3    | S1_13274423 | 1          | 13274423 | 0.000587 | 3     | S1_13274423 | 1          | 13274423 | 4.56E-05 |
| 4    | S1_13424589 | 1          | 13424589 | 0.000781 | 4     | S1_13365703 | 1          | 13365703 | 0.000118 |
| 5    | S1_12742211 | 1          | 12742211 | 0.001161 | 5     | S1_13374151 | 1          | 13374151 | 0.000118 |
| 6    | S1_13374131 | 1          | 13374131 | 0.001282 | 6     | S1_13374131 | 1          | 13374131 | 0.000118 |
| 7    | S1_13365703 | 1          | 13365703 | 0.001282 | 7     | S1_13898444 | 1          | 13898444 | 0.000148 |
| 8    | S1_13374151 | 1          | 13374151 | 0.001282 | 8     | S1_13424589 | 1          | 13424589 | 0.000162 |
| 9    | S2_1517365  | 2          | 1517365  | 0.001537 | 9     | S1_13316461 | 1          | 13316461 | 0.000284 |
| 10   | S2_1525753  | 2          | 1525753  | 0.001537 | 10    | S1_13333531 | 1          | 13333531 | 0.000284 |
| 11   | S2_1525874  | 2          | 1525874  | 0.001537 | 11    | S1_13323794 | 1          | 13323794 | 0.000284 |
| 12   | S2_1531980  | 2          | 1531980  | 0.001772 | 12    | S1_13541723 | 1          | 13541723 | 0.000292 |

|    |             |   |          |          |    |             |   |          |          |
|----|-------------|---|----------|----------|----|-------------|---|----------|----------|
| 13 | S2_34796411 | 2 | 34796411 | 0.001789 | 13 | S1_13541727 | 1 | 13541727 | 0.000292 |
| 14 | S4_4571354  | 4 | 4571354  | 0.001181 | 14 | S1_13541645 | 1 | 13541645 | 0.000292 |
| 15 | S5_642108   | 5 | 642108   | 3.00E-05 | 15 | S1_13776350 | 1 | 13776350 | 0.000294 |
| 16 | S5_649114   | 5 | 649114   | 0.000907 | 16 | S1_13956977 | 1 | 13956977 | 0.000401 |
| 17 | S5_23257108 | 5 | 23257108 | 0.001069 | 17 | S1_12742211 | 1 | 12742211 | 0.000506 |
| 18 | S5_23279042 | 5 | 23279042 | 0.001069 | 18 | S1_14099875 | 1 | 14099875 | 0.000551 |
| 19 | S5_23256042 | 5 | 23256042 | 0.001069 | 19 | S1_13563387 | 1 | 13563387 | 0.00076  |
| 20 | S5_23257107 | 5 | 23257107 | 0.001069 | 20 | S1_13542361 | 1 | 13542361 | 0.000829 |
| 21 | S5_23279024 | 5 | 23279024 | 0.001069 | 21 | S1_13542375 | 1 | 13542375 | 0.000829 |
| 22 | S5_786707   | 5 | 786707   | 0.001558 | 22 | S1_13567724 | 1 | 13567724 | 0.000937 |
| 23 | S5_23287785 | 5 | 23287785 | 0.001746 | 23 | S1_13567733 | 1 | 13567733 | 0.000937 |
| 24 | S5_23303726 | 5 | 23303726 | 0.001746 | 24 | S1_14060399 | 1 | 14060399 | 0.001308 |
| 25 | S5_23307521 | 5 | 23307521 | 0.001746 | 25 | S1_12737403 | 1 | 12737403 | 0.001331 |
| 26 | S5_23310970 | 5 | 23310970 | 0.001746 | 26 | S1_22957410 | 1 | 22957410 | 0.001404 |
| 27 | S5_23312204 | 5 | 23312204 | 0.00177  | 27 | S1_13541716 | 1 | 13541716 | 0.001701 |
| 28 | S5_23314218 | 5 | 23314218 | 0.00177  | 28 | S1_14102208 | 1 | 14102208 | 0.001703 |
| 29 | S6_8886408  | 6 | 8886408  | 5.59E-05 | 29 | S1_13584658 | 1 | 13584658 | 0.001818 |
| 30 | S6_8886434  | 6 | 8886434  | 5.59E-05 | 30 | S1_12704071 | 1 | 12704071 | 0.001966 |
| 31 | S6_8851568  | 6 | 8851568  | 0.000164 | 31 | S2_34796411 | 2 | 34796411 | 0.000224 |
| 32 | S6_8870236  | 6 | 8870236  | 0.000164 | 32 | S2_1344992  | 2 | 1344992  | 0.000701 |
| 33 | S6_8876540  | 6 | 8876540  | 0.000164 | 33 | S2_1517365  | 2 | 1517365  | 0.001077 |
| 34 | S6_8876586  | 6 | 8876586  | 0.000164 | 34 | S2_1525753  | 2 | 1525753  | 0.001077 |
| 35 | S6_8876606  | 6 | 8876606  | 0.000164 | 35 | S2_1525874  | 2 | 1525874  | 0.001077 |
| 36 | S6_8876610  | 6 | 8876610  | 0.000164 | 36 | S2_1531980  | 2 | 1531980  | 0.00123  |
| 37 | S6_8850552  | 6 | 8850552  | 0.000222 | 37 | S2_35179606 | 2 | 35179606 | 0.001561 |
| 38 | S6_8914643  | 6 | 8914643  | 0.00027  | 38 | S2_1416970  | 2 | 1416970  | 0.001649 |
| 39 | S6_8914651  | 6 | 8914651  | 0.00027  | 39 | S2_34784688 | 2 | 34784688 | 0.001664 |
| 40 | S6_8914650  | 6 | 8914650  | 0.00027  | 40 | S2_34791393 | 2 | 34791393 | 0.001664 |
| 41 | S6_8914671  | 6 | 8914671  | 0.00027  | 41 | S2_34791395 | 2 | 34791395 | 0.001664 |
| 42 | S6_8914769  | 6 | 8914769  | 0.00027  | 42 | S2_29638136 | 2 | 29638136 | 0.00184  |

|    |              |    |          |          |    |             |   |          |          |
|----|--------------|----|----------|----------|----|-------------|---|----------|----------|
| 43 | S6_9004225   | 6  | 9004225  | 0.0004   | 43 | S2_29640532 | 2 | 29640532 | 0.00184  |
| 44 | S6_6758215   | 6  | 6758215  | 0.000474 | 44 | S4_4571354  | 4 | 4571354  | 0.000149 |
| 45 | S6_8917933   | 6  | 8917933  | 0.000572 | 45 | S4_3469974  | 4 | 3469974  | 0.00048  |
| 46 | S6_8917936   | 6  | 8917936  | 0.000572 | 46 | S4_5135455  | 4 | 5135455  | 0.000965 |
| 47 | S6_8917962   | 6  | 8917962  | 0.000572 | 47 | S4_3411559  | 4 | 3411559  | 0.001148 |
| 48 | S6_8917185   | 6  | 8917185  | 0.000572 | 48 | S4_3411505  | 4 | 3411505  | 0.001148 |
| 49 | S6_8962742   | 6  | 8962742  | 0.000724 | 49 | S4_3411567  | 4 | 3411567  | 0.001148 |
| 50 | S6_8962796   | 6  | 8962796  | 0.000724 | 50 | S4_3411593  | 4 | 3411593  | 0.001148 |
| 51 | S6_8956202   | 6  | 8956202  | 0.000724 | 51 | S4_3419234  | 4 | 3419234  | 0.001166 |
| 52 | S6_9003844   | 6  | 9003844  | 0.000733 | 52 | S4_5076100  | 4 | 5076100  | 0.001489 |
| 53 | S6_9003866   | 6  | 9003866  | 0.000733 | 53 | S4_4521327  | 4 | 4521327  | 0.001589 |
| 54 | S6_6752461   | 6  | 6752461  | 0.000839 | 54 | S4_4822959  | 4 | 4822959  | 0.001713 |
| 55 | S6_8921201   | 6  | 8921201  | 0.000916 | 55 | S5_23256042 | 5 | 23256042 | 0.000333 |
| 56 | S6_8932488   | 6  | 8932488  | 0.000916 | 56 | S5_23257107 | 5 | 23257107 | 0.000333 |
| 57 | S6_8921200   | 6  | 8921200  | 0.000916 | 57 | S5_23279024 | 5 | 23279024 | 0.000333 |
| 58 | S6_6769492   | 6  | 6769492  | 0.000984 | 58 | S5_23257108 | 5 | 23257108 | 0.000333 |
| 59 | S6_6823579   | 6  | 6823579  | 0.001265 | 59 | S5_23279042 | 5 | 23279042 | 0.000333 |
| 60 | S6_7646336   | 6  | 7646336  | 0.001544 | 60 | S5_642108   | 5 | 642108   | 0.000406 |
| 61 | S6_6819248   | 6  | 6819248  | 0.001553 | 61 | S5_23314218 | 5 | 23314218 | 0.000438 |
| 62 | S6_6769526   | 6  | 6769526  | 0.001727 | 62 | S5_23312204 | 5 | 23312204 | 0.000438 |
| 63 | S6_6769533   | 6  | 6769533  | 0.001727 | 63 | S5_23287785 | 5 | 23287785 | 0.000507 |
| 64 | S6_8975500   | 6  | 8975500  | 0.001852 | 64 | S5_23303726 | 5 | 23303726 | 0.000507 |
| 65 | S6_8977107   | 6  | 8977107  | 0.001852 | 65 | S5_23307521 | 5 | 23307521 | 0.000507 |
| 66 | S6_8977116   | 6  | 8977116  | 0.001852 | 66 | S5_23310970 | 5 | 23310970 | 0.000507 |
| 67 | S6_8977156   | 6  | 8977156  | 0.001852 | 67 | S5_23434999 | 5 | 23434999 | 0.000513 |
| 68 | S6_8977190   | 6  | 8977190  | 0.001852 | 68 | S5_23448630 | 5 | 23448630 | 0.000513 |
| 69 | S10_18115531 | 10 | 18115531 | 0.000757 | 69 | S5_23463399 | 5 | 23463399 | 0.000513 |
| 70 | S10_18145180 | 10 | 18145180 | 0.00119  | 70 | S5_23504663 | 5 | 23504663 | 0.000513 |
| 71 | S10_18127881 | 10 | 18127881 | 0.00119  | 71 | S5_23509333 | 5 | 23509333 | 0.000513 |
| 72 | S10_18387130 | 10 | 18387130 | 0.001451 | 72 | S5_23408360 | 5 | 23408360 | 0.000513 |

|    |              |    |          |          |     |             |   |          |          |
|----|--------------|----|----------|----------|-----|-------------|---|----------|----------|
| 73 | S10_18393744 | 10 | 18393744 | 0.001451 | 73  | S5_23417869 | 5 | 23417869 | 0.000513 |
| 74 | S10_18851296 | 10 | 18851296 | 0.001628 | 74  | S5_23426824 | 5 | 23426824 | 0.000513 |
| 75 | S10_18870300 | 10 | 18870300 | 0.001628 | 75  | S5_23433965 | 5 | 23433965 | 0.000513 |
| 76 | S10_18441292 | 10 | 18441292 | 0.001889 | 76  | S5_23436011 | 5 | 23436011 | 0.000513 |
| 77 | S12_25336023 | 12 | 25336023 | 0.000607 | 77  | S5_23443154 | 5 | 23443154 | 0.000513 |
| 78 | S12_25336024 | 12 | 25336024 | 0.000607 | 78  | S5_23467123 | 5 | 23467123 | 0.000513 |
| 79 | S12_25343744 | 12 | 25343744 | 0.001283 | 79  | S5_23497990 | 5 | 23497990 | 0.000513 |
| 80 | S12_25343720 | 12 | 25343720 | 0.001283 | 80  | S5_23504636 | 5 | 23504636 | 0.000513 |
|    |              |    |          |          | 81  | S5_23508245 | 5 | 23508245 | 0.000513 |
|    |              |    |          |          | 82  | S5_23509334 | 5 | 23509334 | 0.000513 |
|    |              |    |          |          | 83  | S5_23249119 | 5 | 23249119 | 0.000653 |
|    |              |    |          |          | 84  | S5_23249125 | 5 | 23249125 | 0.000653 |
|    |              |    |          |          | 85  | S5_23249605 | 5 | 23249605 | 0.000653 |
|    |              |    |          |          | 86  | S5_23240418 | 5 | 23240418 | 0.000653 |
|    |              |    |          |          | 87  | S5_23249078 | 5 | 23249078 | 0.000653 |
|    |              |    |          |          | 88  | S5_23249237 | 5 | 23249237 | 0.000653 |
|    |              |    |          |          | 89  | S5_23386585 | 5 | 23386585 | 0.00066  |
|    |              |    |          |          | 90  | S5_23386596 | 5 | 23386596 | 0.00066  |
|    |              |    |          |          | 91  | S5_23404379 | 5 | 23404379 | 0.00066  |
|    |              |    |          |          | 92  | S5_25071334 | 5 | 25071334 | 0.00194  |
|    |              |    |          |          | 93  | S5_25044791 | 5 | 25044791 | 0.00194  |
|    |              |    |          |          | 94  | S6_8886408  | 6 | 8886408  | 1.10E-06 |
|    |              |    |          |          | 95  | S6_8886434  | 6 | 8886434  | 1.10E-06 |
|    |              |    |          |          | 96  | S6_8876610  | 6 | 8876610  | 2.67E-06 |
|    |              |    |          |          | 97  | S6_8851568  | 6 | 8851568  | 2.67E-06 |
|    |              |    |          |          | 98  | S6_8870236  | 6 | 8870236  | 2.67E-06 |
|    |              |    |          |          | 99  | S6_8876540  | 6 | 8876540  | 2.67E-06 |
|    |              |    |          |          | 100 | S6_8876586  | 6 | 8876586  | 2.67E-06 |
|    |              |    |          |          | 101 | S6_8876606  | 6 | 8876606  | 2.67E-06 |
|    |              |    |          |          | 102 | S6_8850552  | 6 | 8850552  | 3.52E-06 |

|     |            |   |         |          |
|-----|------------|---|---------|----------|
| 103 | S6_9004225 | 6 | 9004225 | 4.47E-06 |
| 104 | S6_8914650 | 6 | 8914650 | 4.63E-06 |
| 105 | S6_8914671 | 6 | 8914671 | 4.63E-06 |
| 106 | S6_8914769 | 6 | 8914769 | 4.63E-06 |
| 107 | S6_8914643 | 6 | 8914643 | 4.63E-06 |
| 108 | S6_8914651 | 6 | 8914651 | 4.63E-06 |
| 109 | S6_9003844 | 6 | 9003844 | 8.14E-06 |
| 110 | S6_9003866 | 6 | 9003866 | 8.14E-06 |
| 111 | S6_8962742 | 6 | 8962742 | 9.40E-06 |
| 112 | S6_8962796 | 6 | 8962796 | 9.40E-06 |
| 113 | S6_8956202 | 6 | 8956202 | 9.40E-06 |
| 114 | S6_8917185 | 6 | 8917185 | 9.92E-06 |
| 115 | S6_8917933 | 6 | 8917933 | 9.92E-06 |
| 116 | S6_8917936 | 6 | 8917936 | 9.92E-06 |
| 117 | S6_8917962 | 6 | 8917962 | 9.92E-06 |
| 118 | S6_8921201 | 6 | 8921201 | 1.48E-05 |
| 119 | S6_8932488 | 6 | 8932488 | 1.48E-05 |
| 120 | S6_8921200 | 6 | 8921200 | 1.48E-05 |
| 121 | S6_9028593 | 6 | 9028593 | 1.77E-05 |
| 122 | S6_8977156 | 6 | 8977156 | 2.16E-05 |
| 123 | S6_8977190 | 6 | 8977190 | 2.16E-05 |
| 124 | S6_8975500 | 6 | 8975500 | 2.16E-05 |
| 125 | S6_8977107 | 6 | 8977107 | 2.16E-05 |
| 126 | S6_8977116 | 6 | 8977116 | 2.16E-05 |
| 127 | S6_8990795 | 6 | 8990795 | 2.18E-05 |
| 128 | S6_9043197 | 6 | 9043197 | 2.27E-05 |
| 129 | S6_8977712 | 6 | 8977712 | 3.07E-05 |
| 130 | S6_8982135 | 6 | 8982135 | 3.43E-05 |
| 131 | S6_8977949 | 6 | 8977949 | 4.15E-05 |
| 132 | S6_8977972 | 6 | 8977972 | 4.15E-05 |

|     |              |    |          |          |
|-----|--------------|----|----------|----------|
| 133 | S6_6758215   | 6  | 6758215  | 9.19E-05 |
| 134 | S6_7646336   | 6  | 7646336  | 0.000119 |
| 135 | S6_7647706   | 6  | 7647706  | 0.000132 |
| 136 | S6_7647695   | 6  | 7647695  | 0.000132 |
| 137 | S6_6769533   | 6  | 6769533  | 0.000143 |
| 138 | S6_6769526   | 6  | 6769526  | 0.000143 |
| 139 | S6_6769492   | 6  | 6769492  | 0.000151 |
| 140 | S6_7630128   | 6  | 7630128  | 0.000158 |
| 141 | S6_7614974   | 6  | 7614974  | 0.000158 |
| 142 | S6_7626543   | 6  | 7626543  | 0.000158 |
| 143 | S6_7709724   | 6  | 7709724  | 0.000177 |
| 144 | S6_7538495   | 6  | 7538495  | 0.000205 |
| 145 | S6_7542726   | 6  | 7542726  | 0.000205 |
| 146 | S6_7531094   | 6  | 7531094  | 0.000205 |
| 147 | S6_7557807   | 6  | 7557807  | 0.000205 |
| 148 | S6_6922808   | 6  | 6922808  | 0.000595 |
| 149 | S6_6916461   | 6  | 6916461  | 0.001228 |
| 150 | S6_6535237   | 6  | 6535237  | 0.00124  |
| 151 | S6_6535236   | 6  | 6535236  | 0.00124  |
| 152 | S6_8153078   | 6  | 8153078  | 0.001248 |
| 153 | S6_6697070   | 6  | 6697070  | 0.001742 |
| 154 | S7_10995384  | 7  | 10995384 | 0.001918 |
| 155 | S10_18127881 | 10 | 18127881 | 0.001606 |
| 156 | S10_18145180 | 10 | 18145180 | 0.001606 |
| 157 | S11_17207110 | 11 | 17207110 | 0.001643 |
| 158 | S11_17207113 | 11 | 17207113 | 0.001643 |
| 159 | S12_25336023 | 12 | 25336023 | 0.000843 |
| 160 | S12_25336024 | 12 | 25336024 | 0.000843 |
| 161 | S12_25343720 | 12 | 25343720 | 0.001685 |
| 162 | S12_25343744 | 12 | 25343744 | 0.001685 |



| Farm CPU |             |            |          |          | MLMM |             |            |          |          |
|----------|-------------|------------|----------|----------|------|-------------|------------|----------|----------|
| S.No     | SNP         | Chromosome | Position | P.value  | S.No | SNP         | Chromosome | Position | P.value  |
| 1        | S1_13273091 | 1          | 13273091 | 0.000205 | 1    | S1_13264894 | 1          | 13264894 | 0.000112 |
| 2        | S1_13274423 | 1          | 13274423 | 0.000446 | 2    | S1_13273091 | 1          | 13273091 | 0.000115 |
| 3        | S1_13374131 | 1          | 13374131 | 0.000984 | 3    | S1_13274423 | 1          | 13274423 | 0.000217 |
| 4        | S1_13365703 | 1          | 13365703 | 0.000984 | 4    | S1_13424589 | 1          | 13424589 | 0.000348 |
| 5        | S1_13374151 | 1          | 13374151 | 0.000984 | 5    | S1_13365703 | 1          | 13365703 | 0.000512 |
| 6        | S1_13424589 | 1          | 13424589 | 0.001092 | 6    | S1_13374131 | 1          | 13374131 | 0.000512 |
| 7        | S1_13898444 | 1          | 13898444 | 0.001108 | 7    | S1_13374151 | 1          | 13374151 | 0.000512 |
| 8        | S1_12742211 | 1          | 12742211 | 0.001715 | 8    | S1_12742211 | 1          | 12742211 | 0.000658 |
| 9        | S1_13323794 | 1          | 13323794 | 0.001732 | 9    | S1_13316461 | 1          | 13316461 | 0.001251 |
| 10       | S1_13316461 | 1          | 13316461 | 0.001732 | 10   | S1_13323794 | 1          | 13323794 | 0.001251 |
| 11       | S1_13333531 | 1          | 13333531 | 0.001732 | 11   | S1_13333531 | 1          | 13333531 | 0.001251 |
| 12       | S1_13541723 | 1          | 13541723 | 0.002529 | 12   | S1_12737403 | 1          | 12737403 | 0.001632 |
| 13       | S1_13541727 | 1          | 13541727 | 0.002529 | 13   | S1_13898444 | 1          | 13898444 | 0.001692 |
| 14       | S1_13541645 | 1          | 13541645 | 0.002529 | 14   | S1_12704071 | 1          | 12704071 | 0.002559 |
| 15       | S1_13776350 | 1          | 13776350 | 0.002552 | 15   | S1_13541645 | 1          | 13541645 | 0.002719 |
| 16       | S1_13956977 | 1          | 13956977 | 0.00288  | 16   | S1_13541723 | 1          | 13541723 | 0.002719 |
| 17       | S1_14099875 | 1          | 14099875 | 0.003902 | 17   | S1_13541727 | 1          | 13541727 | 0.002719 |
| 18       | S1_12737403 | 1          | 12737403 | 0.003939 | 18   | S1_1265155  | 1          | 1265155  | 0.002824 |
| 19       | S1_13542361 | 1          | 13542361 | 0.004021 | 19   | S1_13956977 | 1          | 13956977 | 0.003332 |
| 20       | S1_13542375 | 1          | 13542375 | 0.004021 | 20   | S1_13776350 | 1          | 13776350 | 0.003391 |
| 21       | S2_34796411 | 2          | 34796411 | 0.00059  | 21   | S1_1963118  | 1          | 1963118  | 0.003447 |
| 22       | S2_1525753  | 2          | 1525753  | 0.00147  | 22   | S1_1963129  | 1          | 1963129  | 0.003447 |
| 23       | S2_1525874  | 2          | 1525874  | 0.00147  | 23   | S1_2271313  | 1          | 2271313  | 0.003656 |
| 24       | S2_1517365  | 2          | 1517365  | 0.00147  | 24   | S1_12650673 | 1          | 12650673 | 0.004319 |
| 25       | S2_1531980  | 2          | 1531980  | 0.002093 | 25   | S1_13542361 | 1          | 13542361 | 0.005064 |
| 26       | S2_1344992  | 2          | 1344992  | 0.002499 | 26   | S1_13542375 | 1          | 13542375 | 0.005064 |
| 27       | S2_34784688 | 2          | 34784688 | 0.002872 | 27   | S2_34796411 | 2          | 34796411 | 0.00073  |
| 28       | S2_34791393 | 2          | 34791393 | 0.002872 | 28   | S2_1517365  | 2          | 1517365  | 0.001381 |

|    |             |   |          |          |    |             |   |          |          |
|----|-------------|---|----------|----------|----|-------------|---|----------|----------|
| 29 | S2_34791395 | 2 | 34791395 | 0.002872 | 29 | S2_1525753  | 2 | 1525753  | 0.001381 |
| 30 | S2_1416970  | 2 | 1416970  | 0.003939 | 30 | S2_1525874  | 2 | 1525874  | 0.001381 |
| 31 | S2_8165184  | 2 | 8165184  | 0.004014 | 31 | S2_1531980  | 2 | 1531980  | 0.00167  |
| 32 | S2_8165190  | 2 | 8165190  | 0.004014 | 32 | S2_1344992  | 2 | 1344992  | 0.002302 |
| 33 | S2_8165191  | 2 | 8165191  | 0.004014 | 33 | S2_1039309  | 2 | 1039309  | 0.003138 |
| 34 | S2_8165186  | 2 | 8165186  | 0.004014 | 34 | S2_1548690  | 2 | 1548690  | 0.003775 |
| 35 | S2_8165187  | 2 | 8165187  | 0.004014 | 35 | S2_1550369  | 2 | 1550369  | 0.003775 |
| 36 | S2_1550369  | 2 | 1550369  | 0.004058 | 36 | S2_1553290  | 2 | 1553290  | 0.003775 |
| 37 | S2_1548690  | 2 | 1548690  | 0.004058 | 37 | S2_1570980  | 2 | 1570980  | 0.004178 |
| 38 | S2_1553290  | 2 | 1553290  | 0.004058 | 38 | S2_1564468  | 2 | 1564468  | 0.004178 |
| 39 | S2_1570980  | 2 | 1570980  | 0.0048   | 39 | S2_1416970  | 2 | 1416970  | 0.004188 |
| 40 | S2_1564468  | 2 | 1564468  | 0.0048   | 40 | S4_4571354  | 4 | 4571354  | 0.000831 |
| 41 | S4_4571354  | 4 | 4571354  | 0.000391 | 41 | S4_5135455  | 4 | 5135455  | 0.001575 |
| 42 | S4_3469974  | 4 | 3469974  | 0.001551 | 42 | S4_5076100  | 4 | 5076100  | 0.002623 |
| 43 | S4_3419234  | 4 | 3419234  | 0.002479 | 43 | S4_4822959  | 4 | 4822959  | 0.00382  |
| 44 | S4_3411505  | 4 | 3411505  | 0.002492 | 44 | S5_642108   | 5 | 642108   | 1.39E-05 |
| 45 | S4_3411567  | 4 | 3411567  | 0.002492 | 45 | S5_649114   | 5 | 649114   | 0.000834 |
| 46 | S4_3411593  | 4 | 3411593  | 0.002492 | 46 | S5_23256042 | 5 | 23256042 | 0.000914 |
| 47 | S4_3411559  | 4 | 3411559  | 0.002492 | 47 | S5_23257107 | 5 | 23257107 | 0.000914 |
| 48 | S4_5135455  | 4 | 5135455  | 0.0034   | 48 | S5_23257108 | 5 | 23257108 | 0.000914 |
| 49 | S4_5076100  | 4 | 5076100  | 0.004232 | 49 | S5_23279024 | 5 | 23279024 | 0.000914 |
| 50 | S4_4937112  | 4 | 4937112  | 0.004951 | 50 | S5_23279042 | 5 | 23279042 | 0.000914 |
| 51 | S4_4937146  | 4 | 4937146  | 0.004951 | 51 | S5_786707   | 5 | 786707   | 0.00104  |
| 52 | S5_23256042 | 5 | 23256042 | 0.000598 | 52 | S5_23287785 | 5 | 23287785 | 0.001568 |
| 53 | S5_23257107 | 5 | 23257107 | 0.000598 | 53 | S5_23303726 | 5 | 23303726 | 0.001568 |
| 54 | S5_23279024 | 5 | 23279024 | 0.000598 | 54 | S5_23307521 | 5 | 23307521 | 0.001568 |
| 55 | S5_23257108 | 5 | 23257108 | 0.000598 | 55 | S5_23310970 | 5 | 23310970 | 0.001568 |
| 56 | S5_23279042 | 5 | 23279042 | 0.000598 | 56 | S5_23312204 | 5 | 23312204 | 0.001614 |
| 57 | S5_23287785 | 5 | 23287785 | 0.001032 | 57 | S5_23314218 | 5 | 23314218 | 0.001614 |
| 58 | S5_23303726 | 5 | 23303726 | 0.001032 | 58 | S5_23240418 | 5 | 23240418 | 0.001863 |

|    |             |   |          |          |    |             |   |          |          |
|----|-------------|---|----------|----------|----|-------------|---|----------|----------|
| 59 | S5_23307521 | 5 | 23307521 | 0.001032 | 59 | S5_23249078 | 5 | 23249078 | 0.001863 |
| 60 | S5_23310970 | 5 | 23310970 | 0.001032 | 60 | S5_23249119 | 5 | 23249119 | 0.001863 |
| 61 | S5_23408360 | 5 | 23408360 | 0.001067 | 61 | S5_23249125 | 5 | 23249125 | 0.001863 |
| 62 | S5_23417869 | 5 | 23417869 | 0.001067 | 62 | S5_23249237 | 5 | 23249237 | 0.001863 |
| 63 | S5_23426824 | 5 | 23426824 | 0.001067 | 63 | S5_23249605 | 5 | 23249605 | 0.001863 |
| 64 | S5_23433965 | 5 | 23433965 | 0.001067 | 64 | S5_23408360 | 5 | 23408360 | 0.001943 |
| 65 | S5_23436011 | 5 | 23436011 | 0.001067 | 65 | S5_23417869 | 5 | 23417869 | 0.001943 |
| 66 | S5_23443154 | 5 | 23443154 | 0.001067 | 66 | S5_23426824 | 5 | 23426824 | 0.001943 |
| 67 | S5_23467123 | 5 | 23467123 | 0.001067 | 67 | S5_23433965 | 5 | 23433965 | 0.001943 |
| 68 | S5_23497990 | 5 | 23497990 | 0.001067 | 68 | S5_23434999 | 5 | 23434999 | 0.001943 |
| 69 | S5_23504636 | 5 | 23504636 | 0.001067 | 69 | S5_23436011 | 5 | 23436011 | 0.001943 |
| 70 | S5_23508245 | 5 | 23508245 | 0.001067 | 70 | S5_23443154 | 5 | 23443154 | 0.001943 |
| 71 | S5_23509334 | 5 | 23509334 | 0.001067 | 71 | S5_23448630 | 5 | 23448630 | 0.001943 |
| 72 | S5_23434999 | 5 | 23434999 | 0.001067 | 72 | S5_23463399 | 5 | 23463399 | 0.001943 |
| 73 | S5_23448630 | 5 | 23448630 | 0.001067 | 73 | S5_23467123 | 5 | 23467123 | 0.001943 |
| 74 | S5_23463399 | 5 | 23463399 | 0.001067 | 74 | S5_23497990 | 5 | 23497990 | 0.001943 |
| 75 | S5_23504663 | 5 | 23504663 | 0.001067 | 75 | S5_23504636 | 5 | 23504636 | 0.001943 |
| 76 | S5_23509333 | 5 | 23509333 | 0.001067 | 76 | S5_23504663 | 5 | 23504663 | 0.001943 |
| 77 | S5_23314218 | 5 | 23314218 | 0.001168 | 77 | S5_23508245 | 5 | 23508245 | 0.001943 |
| 78 | S5_23312204 | 5 | 23312204 | 0.001168 | 78 | S5_23509333 | 5 | 23509333 | 0.001943 |
| 79 | S5_23249119 | 5 | 23249119 | 0.001177 | 79 | S5_23509334 | 5 | 23509334 | 0.001943 |
| 80 | S5_23249125 | 5 | 23249125 | 0.001177 | 80 | S5_23386585 | 5 | 23386585 | 0.00324  |
| 81 | S5_23249605 | 5 | 23249605 | 0.001177 | 81 | S5_23386596 | 5 | 23386596 | 0.00324  |
| 82 | S5_23240418 | 5 | 23240418 | 0.001177 | 82 | S5_23404379 | 5 | 23404379 | 0.00324  |
| 83 | S5_23249078 | 5 | 23249078 | 0.001177 | 83 | S5_966011   | 5 | 966011   | 0.004407 |
| 84 | S5_23249237 | 5 | 23249237 | 0.001177 | 84 | S6_8886408  | 6 | 8886408  | 2.33E-05 |
| 85 | S5_786707   | 5 | 786707   | 0.001774 | 85 | S6_8886434  | 6 | 8886434  | 2.33E-05 |
| 86 | S5_966011   | 5 | 966011   | 0.001831 | 86 | S6_8851568  | 6 | 8851568  | 7.85E-05 |
| 87 | S5_23386585 | 5 | 23386585 | 0.00199  | 87 | S6_8870236  | 6 | 8870236  | 7.85E-05 |
| 88 | S5_23386596 | 5 | 23386596 | 0.00199  | 88 | S6_8876540  | 6 | 8876540  | 7.85E-05 |

|     |             |   |          |          |     |            |   |         |          |
|-----|-------------|---|----------|----------|-----|------------|---|---------|----------|
| 89  | S5_23404379 | 5 | 23404379 | 0.00199  | 89  | S6_8876586 | 6 | 8876586 | 7.85E-05 |
| 90  | S5_1080429  | 5 | 1080429  | 0.004782 | 90  | S6_8876606 | 6 | 8876606 | 7.85E-05 |
| 91  | S6_8886408  | 6 | 8886408  | 1.16E-05 | 91  | S6_8876610 | 6 | 8876610 | 7.85E-05 |
| 92  | S6_8886434  | 6 | 8886434  | 1.16E-05 | 92  | S6_8850552 | 6 | 8850552 | 0.000107 |
| 93  | S6_8851568  | 6 | 8851568  | 2.73E-05 | 93  | S6_8914643 | 6 | 8914643 | 0.000137 |
| 94  | S6_8870236  | 6 | 8870236  | 2.73E-05 | 94  | S6_8914650 | 6 | 8914650 | 0.000137 |
| 95  | S6_8876540  | 6 | 8876540  | 2.73E-05 | 95  | S6_8914651 | 6 | 8914651 | 0.000137 |
| 96  | S6_8876586  | 6 | 8876586  | 2.73E-05 | 96  | S6_8914671 | 6 | 8914671 | 0.000137 |
| 97  | S6_8876606  | 6 | 8876606  | 2.73E-05 | 97  | S6_8914769 | 6 | 8914769 | 0.000137 |
| 98  | S6_8876610  | 6 | 8876610  | 2.73E-05 | 98  | S6_9004225 | 6 | 9004225 | 0.000214 |
| 99  | S6_8850552  | 6 | 8850552  | 3.47E-05 | 99  | S6_6758215 | 6 | 6758215 | 0.000291 |
| 100 | S6_8914643  | 6 | 8914643  | 4.38E-05 | 100 | S6_8917185 | 6 | 8917185 | 0.000303 |
| 101 | S6_8914651  | 6 | 8914651  | 4.38E-05 | 101 | S6_8917933 | 6 | 8917933 | 0.000303 |
| 102 | S6_8914650  | 6 | 8914650  | 4.38E-05 | 102 | S6_8917936 | 6 | 8917936 | 0.000303 |
| 103 | S6_8914671  | 6 | 8914671  | 4.38E-05 | 103 | S6_8917962 | 6 | 8917962 | 0.000303 |
| 104 | S6_8914769  | 6 | 8914769  | 4.38E-05 | 104 | S6_8956202 | 6 | 8956202 | 0.00039  |
| 105 | S6_9004225  | 6 | 9004225  | 5.08E-05 | 105 | S6_8962742 | 6 | 8962742 | 0.00039  |
| 106 | S6_8917185  | 6 | 8917185  | 7.10E-05 | 106 | S6_8962796 | 6 | 8962796 | 0.00039  |
| 107 | S6_8917933  | 6 | 8917933  | 7.10E-05 | 107 | S6_9003844 | 6 | 9003844 | 0.000412 |
| 108 | S6_8917936  | 6 | 8917936  | 7.10E-05 | 108 | S6_9003866 | 6 | 9003866 | 0.000412 |
| 109 | S6_8917962  | 6 | 8917962  | 7.10E-05 | 109 | S6_8921200 | 6 | 8921200 | 0.0005   |
| 110 | S6_9003844  | 6 | 9003844  | 8.72E-05 | 110 | S6_8921201 | 6 | 8921201 | 0.0005   |
| 111 | S6_9003866  | 6 | 9003866  | 8.72E-05 | 111 | S6_8932488 | 6 | 8932488 | 0.0005   |
| 112 | S6_8956202  | 6 | 8956202  | 9.28E-05 | 112 | S6_6752461 | 6 | 6752461 | 0.000506 |
| 113 | S6_8962742  | 6 | 8962742  | 9.28E-05 | 113 | S6_6769492 | 6 | 6769492 | 0.00066  |
| 114 | S6_8962796  | 6 | 8962796  | 9.28E-05 | 114 | S6_6823579 | 6 | 6823579 | 0.000775 |
| 115 | S6_8921200  | 6 | 8921200  | 0.000102 | 115 | S6_6819248 | 6 | 6819248 | 0.000983 |
| 116 | S6_8921201  | 6 | 8921201  | 0.000102 | 116 | S6_7646336 | 6 | 7646336 | 0.001025 |
| 117 | S6_8932488  | 6 | 8932488  | 0.000102 | 117 | S6_8975500 | 6 | 8975500 | 0.001114 |
| 118 | S6_8990795  | 6 | 8990795  | 0.00019  | 118 | S6_8977107 | 6 | 8977107 | 0.001114 |

|     |            |   |         |          |     |              |    |          |          |
|-----|------------|---|---------|----------|-----|--------------|----|----------|----------|
| 119 | S6_8977156 | 6 | 8977156 | 0.000201 | 119 | S6_8977116   | 6  | 8977116  | 0.001114 |
| 120 | S6_8977190 | 6 | 8977190 | 0.000201 | 120 | S6_8977156   | 6  | 8977156  | 0.001114 |
| 121 | S6_8975500 | 6 | 8975500 | 0.000201 | 121 | S6_8977190   | 6  | 8977190  | 0.001114 |
| 122 | S6_8977107 | 6 | 8977107 | 0.000201 | 122 | S6_6769533   | 6  | 6769533  | 0.00121  |
| 123 | S6_8977116 | 6 | 8977116 | 0.000201 | 123 | S6_6769526   | 6  | 6769526  | 0.00121  |
| 124 | S6_9028593 | 6 | 9028593 | 0.000251 | 124 | S6_7647695   | 6  | 7647695  | 0.001433 |
| 125 | S6_8977712 | 6 | 8977712 | 0.000292 | 125 | S6_7647706   | 6  | 7647706  | 0.001433 |
| 126 | S6_9043197 | 6 | 9043197 | 0.000311 | 126 | S6_8990795   | 6  | 8990795  | 0.001487 |
| 127 | S6_8982135 | 6 | 8982135 | 0.00035  | 127 | S6_7614974   | 6  | 7614974  | 0.001496 |
| 128 | S6_8977972 | 6 | 8977972 | 0.000413 | 128 | S6_7626543   | 6  | 7626543  | 0.001496 |
| 129 | S6_8977949 | 6 | 8977949 | 0.000413 | 129 | S6_7630128   | 6  | 7630128  | 0.001496 |
| 130 | S6_6752461 | 6 | 6752461 | 0.000557 | 130 | S6_7709724   | 6  | 7709724  | 0.001535 |
| 131 | S6_6769492 | 6 | 6769492 | 0.000605 | 131 | S6_27969065  | 6  | 27969065 | 0.001852 |
| 132 | S6_6819248 | 6 | 6819248 | 0.000852 | 132 | S6_27969545  | 6  | 27969545 | 0.001852 |
| 133 | S6_6823579 | 6 | 6823579 | 0.000868 | 133 | S6_8977712   | 6  | 8977712  | 0.001962 |
| 134 | S6_6922808 | 6 | 6922808 | 0.00092  | 134 | S6_9028593   | 6  | 9028593  | 0.002109 |
| 135 | S6_7709724 | 6 | 7709724 | 0.001029 | 135 | S6_8982135   | 6  | 8982135  | 0.002335 |
| 136 | S6_6769533 | 6 | 6769533 | 0.001072 | 136 | S6_8977949   | 6  | 8977949  | 0.002451 |
| 137 | S6_6769526 | 6 | 6769526 | 0.001072 | 137 | S6_8977972   | 6  | 8977972  | 0.002451 |
| 138 | S6_7647706 | 6 | 7647706 | 0.001098 | 138 | S6_6922808   | 6  | 6922808  | 0.002494 |
| 139 | S6_7647695 | 6 | 7647695 | 0.001098 | 139 | S6_9043197   | 6  | 9043197  | 0.002688 |
| 140 | S6_7538495 | 6 | 7538495 | 0.00118  | 140 | S6_7531094   | 6  | 7531094  | 0.002834 |
| 141 | S6_7542726 | 6 | 7542726 | 0.00118  | 141 | S6_7538495   | 6  | 7538495  | 0.002834 |
| 142 | S6_7531094 | 6 | 7531094 | 0.00118  | 142 | S6_7542726   | 6  | 7542726  | 0.002834 |
| 143 | S6_7557807 | 6 | 7557807 | 0.00118  | 143 | S6_7557807   | 6  | 7557807  | 0.002834 |
| 144 | S6_7646336 | 6 | 7646336 | 0.001387 | 144 | S6_6916461   | 6  | 6916461  | 0.004863 |
| 145 | S6_7614974 | 6 | 7614974 | 0.001493 | 145 | S10_18115531 | 10 | 18115531 | 0.000456 |
| 146 | S6_7626543 | 6 | 7626543 | 0.001493 | 146 | S10_18127881 | 10 | 18127881 | 0.000888 |
| 147 | S6_7630128 | 6 | 7630128 | 0.001493 | 147 | S10_18145180 | 10 | 18145180 | 0.000888 |
| 148 | S6_6916461 | 6 | 6916461 | 0.001916 | 148 | S10_18393744 | 10 | 18393744 | 0.000962 |

|     |             |   |          |          |     |              |    |          |          |
|-----|-------------|---|----------|----------|-----|--------------|----|----------|----------|
| 149 | S6_6513819  | 6 | 6513819  | 0.002159 | 149 | S10_18387130 | 10 | 18387130 | 0.000962 |
| 150 | S6_6514012  | 6 | 6514012  | 0.002159 | 150 | S10_18441292 | 10 | 18441292 | 0.001283 |
| 151 | S6_7045328  | 6 | 7045328  | 0.002197 | 151 | S10_18851296 | 10 | 18851296 | 0.001283 |
| 152 | S6_7045355  | 6 | 7045355  | 0.002197 | 152 | S10_18870300 | 10 | 18870300 | 0.001283 |
| 153 | S6_27969065 | 6 | 27969065 | 0.002493 | 153 | S10_18402152 | 10 | 18402152 | 0.001507 |
| 154 | S6_27969545 | 6 | 27969545 | 0.002493 | 154 | S10_18897171 | 10 | 18897171 | 0.001764 |
| 155 | S6_6996522  | 6 | 6996522  | 0.002525 | 155 | S10_18898657 | 10 | 18898657 | 0.001764 |
| 156 | S6_7001492  | 6 | 7001492  | 0.002525 | 156 | S10_18416827 | 10 | 18416827 | 0.002831 |
| 157 | S6_7008351  | 6 | 7008351  | 0.002525 | 157 | S10_18417432 | 10 | 18417432 | 0.002831 |
| 158 | S6_7531433  | 6 | 7531433  | 0.003008 | 158 | S10_18421895 | 10 | 18421895 | 0.002831 |
| 159 | S6_7531437  | 6 | 7531437  | 0.003008 | 159 | S10_18422007 | 10 | 18422007 | 0.002831 |
| 160 | S6_7557905  | 6 | 7557905  | 0.003008 | 160 | S10_18422024 | 10 | 18422024 | 0.002831 |
| 161 | S6_7581809  | 6 | 7581809  | 0.003026 | 161 | S10_18432420 | 10 | 18432420 | 0.002831 |
| 162 | S6_6697070  | 6 | 6697070  | 0.003737 | 162 | S10_18446898 | 10 | 18446898 | 0.003701 |
| 163 | S6_6916223  | 6 | 6916223  | 0.00403  | 163 | S10_14796704 | 10 | 14796704 | 0.004618 |
| 164 | S6_6916163  | 6 | 6916163  | 0.004215 | 164 | S12_25336023 | 12 | 25336023 | 0.000437 |
| 165 | S6_6535236  | 6 | 6535236  | 0.004266 | 165 | S12_25336024 | 12 | 25336024 | 0.000437 |
| 166 | S6_6535237  | 6 | 6535237  | 0.004266 | 166 | S12_25343720 | 12 | 25343720 | 0.001229 |
| 167 | S6_6869009  | 6 | 6869009  | 0.004267 | 167 | S12_25343744 | 12 | 25343744 | 0.001229 |
| 168 | S6_6816739  | 6 | 6816739  | 0.004398 |     |              |    |          |          |
| 169 | S6_8153078  | 6 | 8153078  | 0.004465 |     |              |    |          |          |
| 170 | S6_7522397  | 6 | 7522397  | 0.004538 |     |              |    |          |          |
| 171 | S6_5759360  | 6 | 5759360  | 0.004568 |     |              |    |          |          |
| 172 | S6_6924352  | 6 | 6924352  | 0.005003 |     |              |    |          |          |
| 173 | S6_6924355  | 6 | 6924355  | 0.005003 |     |              |    |          |          |
| 174 | S6_6924358  | 6 | 6924358  | 0.005003 |     |              |    |          |          |
| 175 | S6_6924361  | 6 | 6924361  | 0.005003 |     |              |    |          |          |
| 176 | S6_6924356  | 6 | 6924356  | 0.005003 |     |              |    |          |          |
| 177 | S6_6924359  | 6 | 6924359  | 0.005003 |     |              |    |          |          |
| 178 | S6_6934785  | 6 | 6934785  | 0.005003 |     |              |    |          |          |

|     |              |    |          |          |  |  |  |  |  |
|-----|--------------|----|----------|----------|--|--|--|--|--|
| 179 | S7_10995384  | 7  | 10995384 | 0.001243 |  |  |  |  |  |
| 180 | S7_19462828  | 7  | 19462828 | 0.003362 |  |  |  |  |  |
| 181 | S7_19463575  | 7  | 19463575 | 0.003362 |  |  |  |  |  |
| 182 | S7_19478033  | 7  | 19478033 | 0.003585 |  |  |  |  |  |
| 183 | S7_19477481  | 7  | 19477481 | 0.004478 |  |  |  |  |  |
| 184 | S10_14796704 | 10 | 14796704 | 0.001675 |  |  |  |  |  |
| 185 | S10_18115531 | 10 | 18115531 | 0.001865 |  |  |  |  |  |
| 186 | S10_18387130 | 10 | 18387130 | 0.003443 |  |  |  |  |  |
| 187 | S10_18393744 | 10 | 18393744 | 0.003443 |  |  |  |  |  |
| 188 | S10_18145180 | 10 | 18145180 | 0.003477 |  |  |  |  |  |
| 189 | S10_18127881 | 10 | 18127881 | 0.003477 |  |  |  |  |  |
| 190 | S10_14780779 | 10 | 14780779 | 0.004864 |  |  |  |  |  |

**Supplementary Table S 4: List of candidate genes (defense related genes) identified in the associated QTN regions**

| S. No. | Gene Locus ID                  | Chromosome | SNPs                                                            | Description or Putative Function (RAP-DB annotation)                                 |
|--------|--------------------------------|------------|-----------------------------------------------------------------|--------------------------------------------------------------------------------------|
| 1      | <a href="#">LOC_Os01g22640</a> | 1          | S1_12737403                                                     | GDSL-like lipase/acylhydrolase, putative, expressed                                  |
| 2      | <a href="#">LOC_Os01g22660</a> | 1          | S1_12742211                                                     | GDSL-like lipase/acylhydrolase, putative, expressed                                  |
| 3      | <a href="#">LOC_Os01g23610</a> | 1          | S1_13273091, S1_13274423                                        | dihydrolipoyl dehydrogenase, putative, expressed                                     |
| 4      | <a href="#">LOC_Os01g23670</a> | 1          | S1_13316461                                                     | retrotransposon protein, putative, unclassified                                      |
| 5      | <a href="#">LOC_Os01g23680</a> | 1          | S1_13323794S1_13333531                                          | rossmann fold nucleotide-binding protein involved in DNA uptake, putative, expressed |
| 6      | <a href="#">LOC_Os01g23780</a> | 1          | S1_13365703, S1_13374131, S1_13374151                           | OsMADS95 - MADS-box family gene with M-beta type-box, expressed                      |
| 7      | <a href="#">LOC_Os01g23850</a> | 1          | S1_13424589                                                     | transposon protein, putative, CACTA, En/Spm sub-class, expressed                     |
| 8      | <a href="#">LOC_Os01g24030</a> | 1          | S1_13541645, S1_13541723, S1_13541727, S1_13542361, S1_13542375 | AMP-binding enzyme, putative, expressed                                              |



|    |                                |   |                                                             |                                                                                                   |
|----|--------------------------------|---|-------------------------------------------------------------|---------------------------------------------------------------------------------------------------|
| 9  | <a href="#">LOC_Os01g24430</a> | 1 | S1_13776350,                                                | expressed protein                                                                                 |
| 10 | <a href="#">LOC_Os01g24690</a> | 1 | S1_13898444                                                 | 60S ribosomal protein L23A, putative, expressed, response to abiotic stimulus, response to stress |
| 11 | <a href="#">LOC_Os01g24790</a> | 1 | S1_13956977                                                 | transferase family protein, putative, expressed                                                   |
| 12 | <a href="#">LOC_Os01g25000</a> | 1 | S1_14099875                                                 | retrotransposon protein, putative, unclassified, expressed                                        |
| 13 | <a href="#">LOC_Os02g03330</a> | 2 | S2_1344992                                                  | expressed protein                                                                                 |
| 14 | <a href="#">LOC_Os02g03480</a> | 2 | S2_1416970                                                  | THION24 - Plant thionin family protein precursor, expressed                                       |
| 15 | <a href="#">LOC_Os02g03660</a> | 2 | S2_1517365, S2_1525753, S2_1525874                          | OsFBDUF12 - F-box and DUF domain containing protein, expressed                                    |
| 16 | <a href="#">LOC_Os02g03670</a> | 2 | S2_1531980                                                  | expressed protein                                                                                 |
| 17 | <a href="#">LOC_Os02g03700</a> | 2 | S2_1548690, S2_1550369, S2_1553290                          | expressed protein                                                                                 |
| 18 | <a href="#">LOC_Os02g03730</a> | 2 | S2_1564468,                                                 | SWIB/MDM2 domain containing protein, expressed                                                    |
| 19 | <a href="#">LOC_Os02g03750</a> | 2 | S2_1570980                                                  | polygalacturonase, putative, expressed                                                            |
| 20 | <a href="#">LOC_Os02g14760</a> | 2 | S2_8165184, S2_8165186, S2_8165187, S2_8165190, S2_8165191  | CID11, putative, expressed                                                                        |
| 21 | <a href="#">LOC_Os02g56740</a> | 2 | S2_34784688, S2_34791393, S2_34791395                       | translation initiation factor eIF-2B subunit epsilon, putative, expressed                         |
| 22 | <a href="#">LOC_Os02g56750</a> | 2 | S2_34796411                                                 | OsFBX65 - F-box domain containing protein, expressed                                              |
| 23 | <a href="#">LOC_Os04g06520</a> | 4 | S4_3411505, S4_3411559, S4_3411567, S4_3411593, S4_3419234, | expressed protein                                                                                 |
| 24 | <a href="#">LOC_Os04g06590</a> | 4 | S4_3469974                                                  | expressed protein                                                                                 |
| 25 | <a href="#">LOC_Os04g08470</a> | 4 | S4_4571354,                                                 | OsFBX116 - F-box domain containing protein, expressed                                             |
| 26 | <a href="#">LOC_Os04g09284</a> | 4 | S4_4937112, S4_4937146                                      | retrotransposon protein, putative, Ty3-gypsy subclass, expressed                                  |
| 27 | <a href="#">LOC_Os04g09580</a> | 4 | S4_5076100, S4_5135455                                      | expressed protein                                                                                 |
| 28 | <a href="#">LOC_Os05g02400</a> | 5 | S5_786707                                                   | RNA recognition motif containing protein, expressed                                               |



|    |                                  |   |                                                                              |                                                                                                     |
|----|----------------------------------|---|------------------------------------------------------------------------------|-----------------------------------------------------------------------------------------------------|
| 29 | <a href="#">LOC_Os05g02700</a>   | 5 | S5_966011                                                                    | expressed protein                                                                                   |
| 30 | <a href="#">LOC_Os05g02940</a>   | 5 | S5_1080429                                                                   | calcium-transporting ATPase 2, endoplasmic reticulum-type, putative, expressed                      |
| 31 | <a href="#">LOC_Os05g39580</a>   | 5 | S5_23240418                                                                  | bet v I allergen family protein, putative, expressed                                                |
| 32 | <a href="#">LOC_Os05g39590</a>   | 5 | S5_23249078, S5_23249119, S5_23249125, S5_23249237, S5_23249605              | AP2 domain containing protein, expressed                                                            |
| 33 | <a href="#">LOC_Os05g39610</a>   | 5 | S5_23256042, S5_23257107, S5_23257108,                                       | exo70 exocyst complex subunit domain containing protein, expressed                                  |
| 34 | <a href="#">LOC_Os05g39650</a>   | 5 | S5_23287785, S5_23279024                                                     | phytanoyl-CoA dioxygenase, putative, expressed                                                      |
| 35 | <a href="#">LOC_Os05g39700</a>   | 5 | S5_23303726,                                                                 | hypothetical protein                                                                                |
| 36 | <a href="#">LOC_Os05g39710</a>   | 5 | S5_23307521,                                                                 | expressed protein                                                                                   |
| 37 | <a href="#">LOC_Os05g39720</a>   | 5 | S5_23310970, S5_23312204, S5_23314218                                        | WRKY70, expressed                                                                                   |
| 38 | <a href="#">LOC_Os05g39800</a>   | 5 | S5_23386585, S5_23386596                                                     | NFD4, putative, expressed                                                                           |
| 39 | <a href="#">LOC_Os05g39840</a>   | 5 | S5_23404379, S5_23408360, S5_23417869                                        | expressed protein                                                                                   |
| 40 | <a href="#">LOC_Os05g39860</a>   | 5 | S5_23426824,                                                                 | expressed protein                                                                                   |
| 41 | <a href="#">LOC_Os05g39870</a>   | 5 | S5_23433965                                                                  | CAMK_KIN1/SNF1/Nim1_like.24 - CAMK includes calcium/calmodulin depe dent protein kinases, expressed |
| 42 | <a href="#">LOC_Os05g39880</a>   | 5 | S5_23434999, S5_23436011                                                     | expressed protein                                                                                   |
| 43 | <a href="#">LOC_Os05g39900</a>   | 5 | S5_23443154, S5_23448630                                                     | CBL-interacting serine/threonine-protein kinase 15, putative, expressed                             |
| 44 | <a href="#">LOC_Os05g39930</a>   | 5 | S5_23463399, S5_23467123                                                     | spotted leaf 11, putative, expressed                                                                |
| 45 | <a href="#">LOC_Os05g40010</a>   | 5 | S5_23497990, S5_23504636, S5_23504663, S5_23508245, S5_23509333, S5_23509334 | LTPL17 - Protease inhibitor/seed storage/LTP family protein precursor, expressed                    |
| 46 | <a href="#">LOC_Os06g46149</a>   | 6 | S6_27969065,S6_27969545                                                      | serine/arginine repetitive matrix protein 1, putative, expressed                                    |
| 47 | <a href="#">LOC_Os06g11010</a>   | 6 | S6_5759360                                                                   | eukaryotic aspartyl protease domain containing protein, expressed                                   |
| 48 | <a href="#">LOC_Os06g12160.1</a> | 6 | S6_6513819, S6_6514012                                                       | AAA-type ATPase family protein, putative, expressed                                                 |

|    |                                  |   |                                                                                    |                                                                         |
|----|----------------------------------|---|------------------------------------------------------------------------------------|-------------------------------------------------------------------------|
| 49 | <a href="#">LOC_Os06g12190.1</a> | 6 | S6_6535236, S6_6535237                                                             | glutaredoxin, putative, expressed                                       |
| 50 | <a href="#">LOC_Os06g12360.1</a> | 6 | S6_6697070                                                                         | pentatricopeptide, putative, expressed                                  |
| 51 | <a href="#">LOC_Os06g12450.1</a> | 6 | S6_6752461                                                                         | soluble starch synthase 2-3, chloroplast precursor, putative, expressed |
| 52 | <a href="#">LOC_Os06g12470</a>   | 6 | S6_6769492, S6_6769526, S6_6769533                                                 | retrotransposon protein, putative, Ty3-gypsy subclass, expressed        |
| 53 | <a href="#">LOC_Os06g12580.1</a> | 6 | S6_6816739, S6_6819248                                                             | pro-resilin precursor, putative, expressed                              |
| 54 | <a href="#">LOC_Os06g12590.1</a> | 6 | S6_6823579                                                                         | protein kinase, putative, expressed                                     |
| 55 | <a href="#">LOC_Os06g12610.1</a> | 6 | S6_6869009                                                                         | auxin efflux carrier component, putative, expressed                     |
| 56 | <a href="#">LOC_Os06g12660.1</a> | 6 | S6_6916163, S6_6916223, S6_6916461                                                 | NHL repeat-containing protein, putative, expressed                      |
| 57 | <a href="#">LOC_Os06g12680.1</a> | 6 | S6_6922808, S6_6924352, S6_6924355, S6_6924356, S6_6924358, S6_6924359, S6_6924361 | RING-H2 finger protein, putative, expressed                             |
| 58 | <a href="#">LOC_Os06g12690</a>   | 6 | S6_6934785                                                                         | DCN1-like protein 2, putative, expressed                                |
| 59 | <a href="#">LOC_Os06g12810.1</a> | 6 | S6_6996522, S6_7001492                                                             | proteins of unknown function domain containing protein, expressed       |
| 60 | <a href="#">LOC_Os06g12820.1</a> | 6 | S6_7008351                                                                         | proteins of unknown function domain containing protein, expressed       |
| 61 | <a href="#">LOC_Os06g12870.1</a> | 6 | S6_7045328, S6_7045355                                                             | leaf senescence related protein, putative, expressed                    |
| 62 | <a href="#">LOC_Os06g13590</a>   | 6 | S6_7522397                                                                         | PE-PGRS family protein, putative, expressed                             |
| 63 | <a href="#">LOC_Os06g13600.1</a> | 6 | S6_7531094, S6_7531433, S6_7531437, S6_7538495                                     | HEAT repeat family protein, putative, expressed                         |
| 64 | <a href="#">LOC_Os06g13610</a>   | 6 | S6_7542726                                                                         | expressed protein                                                       |
| 65 | <a href="#">LOC_Os06g13640</a>   | 6 | S6_7557807, S6_7557905                                                             | expressed protein                                                       |
| 66 | <a href="#">LOC_Os06g13660</a>   | 6 | S6_7581809                                                                         | alanyl-tRNA synthetase, putative, expressed                             |
| 67 | <a href="#">LOC_Os06g13740</a>   | 6 | S6_7614974                                                                         | transposon protein, putative, unclassified, expressed                   |
| 68 | <a href="#">LOC_Os06g13760.1</a> | 6 | S6_7626543, S6_7630128                                                             | glycosyl transferase 8 domain containing protein, putative, expressed   |
| 69 | <a href="#">LOC_Os06g13800</a>   | 6 | S6_7646336, S6_7647695, S6_7647706                                                 | expressed protein                                                       |

|    |                                  |   |                                                                                                                                    |                                                                   |
|----|----------------------------------|---|------------------------------------------------------------------------------------------------------------------------------------|-------------------------------------------------------------------|
| 70 | <a href="#">LOC_Os06g13870.1</a> | 6 | S6_7709724                                                                                                                         | U-box protein CMPG1, putative, expressed                          |
| 71 | <a href="#">LOC_Os06g14510.3</a> | 6 | S6_8153078                                                                                                                         | glucose-6-phosphate isomerase, putative, expressed                |
| 72 | <a href="#">LOC_Os06g15630</a>   | 6 | S6_8850552, S6_8851568                                                                                                             | retrotransposon protein, putative, unclassified, expressed        |
| 73 | <a href="#">LOC_Os06g15660</a>   | 6 | S6_8870236                                                                                                                         | retrotransposon protein, putative, unclassified, expressed        |
| 74 | <a href="#">LOC_Os06g15680.1</a> | 6 | S6_8876540, S6_8876586, S6_8876606, S6_8876610                                                                                     | cytochrome P450 71A6, putative, expressed                         |
| 75 | <a href="#">LOC_Os06g15700</a>   | 6 | S6_8886408, S6_8886434                                                                                                             | expressed protein                                                 |
| 76 | <a href="#">LOC_Os06g15730</a>   | 6 | S6_8914643, S6_8914650, S6_8914651, S6_8914671, S6_8914769, S6_8917185, S6_8917933, S6_8917936, S6_8917962, S6_8921200, S6_8921201 | expressed protein                                                 |
| 77 | <a href="#">LOC_Os06g15750</a>   | 6 | S6_8932488                                                                                                                         | NB-ARC domain containing protein, expressed                       |
| 78 | <a href="#">LOC_Os06g15760.1</a> | 6 | S6_8956202                                                                                                                         | eukaryotic aspartyl protease domain containing protein, expressed |
| 79 | <a href="#">LOC_Os06g15779.1</a> | 6 | S6_8962742, S6_8962796                                                                                                             | aluminum-activated malate transporter, putative, expressed        |
| 80 | <a href="#">LOC_Os06g15810.1</a> | 6 | S6_8975500                                                                                                                         | integral membrane protein, putative, expressed                    |
| 81 | <a href="#">LOC_Os06g15820.1</a> | 6 | S6_8977107, S6_8977116, S6_8977156, S6_8977190, S6_8977712, S6_8977949, S6_8977972, S6_8982135                                     | NHL repeat-containing protein, putative, expressed                |
| 82 | <a href="#">LOC_Os06g15840</a>   | 6 | S6_8990795                                                                                                                         | transposon protein, putative, CACTA, En/Spm sub-class, expressed  |
| 83 | <a href="#">LOC_Os06g15850</a>   | 6 | S6_9003844, S6_9003866, S6_9004225                                                                                                 | transposon protein, putative, CACTA, En/Spm sub-class, expressed  |
| 84 | <a href="#">LOC_Os06g15910</a>   | 6 | S6_9028593, S6_9043197                                                                                                             | potassium transporter, putative, expressed                        |
| 85 | <a href="#">LOC_Os07g18600</a>   | 7 | S7_10995384                                                                                                                        | OsFBL37 - F-box domain and LRR containing protein, expressed      |
| 86 | <a href="#">LOC_Os07g32630.1</a> | 7 | S7_19462828, S7_19463575,                                                                                                          | UDP-glucuronosyl and UDP-glucosyl transferase                     |

|    |                                |    |                             |                                                                                            |
|----|--------------------------------|----|-----------------------------|--------------------------------------------------------------------------------------------|
|    |                                |    |                             | domain containing protein, expressed                                                       |
| 87 | <a href="#">LOC_Os07g32650</a> | 7  | S7_19477481, S7_19478033    | retrotransposon protein, putative, unclassified, expressed                                 |
| 88 | <a href="#">LOC_Os10g28410</a> | 10 | S10_14780779, S10_14796704  | GA19388-PA, putative, expressed                                                            |
| 89 | <a href="#">LOC_Os10g33980</a> | 10 | S10_18115531, S10_18127881, | thiamine pyrophosphate enzyme, N-terminal TPP binding domain containing protein, expressed |
| 90 | <a href="#">LOC_Os10g34010</a> | 10 | S10_18145180                | expressed protein                                                                          |
| 91 | <a href="#">LOC_Os10g34470</a> | 10 | S10_18387130                | HD domain containing protein 2, putative, expressed                                        |
| 92 | <a href="#">LOC_Os10g34480</a> | 10 | S10_18393744                | cytochrome P450, putative, expressed                                                       |
