# Supplementary material for: Multiple Genome Wide Association Mapping Models Identify Quantitative Trait Nucleotides for Brown Planthopper (Nilaparvata lugens) Resistance in MAGIC Indica Population of Rice
Source: MDPI journal article supplement (doi:10.3390/vaccines8040608), 2020-10-14
Supplement: s1 [file s1]

## Supplementary Figures

**Supplementary Figure S1: Graphic representation of physical locations of the common SNPs for BPH resistance identified using single and multi locus models on all chromosomes**

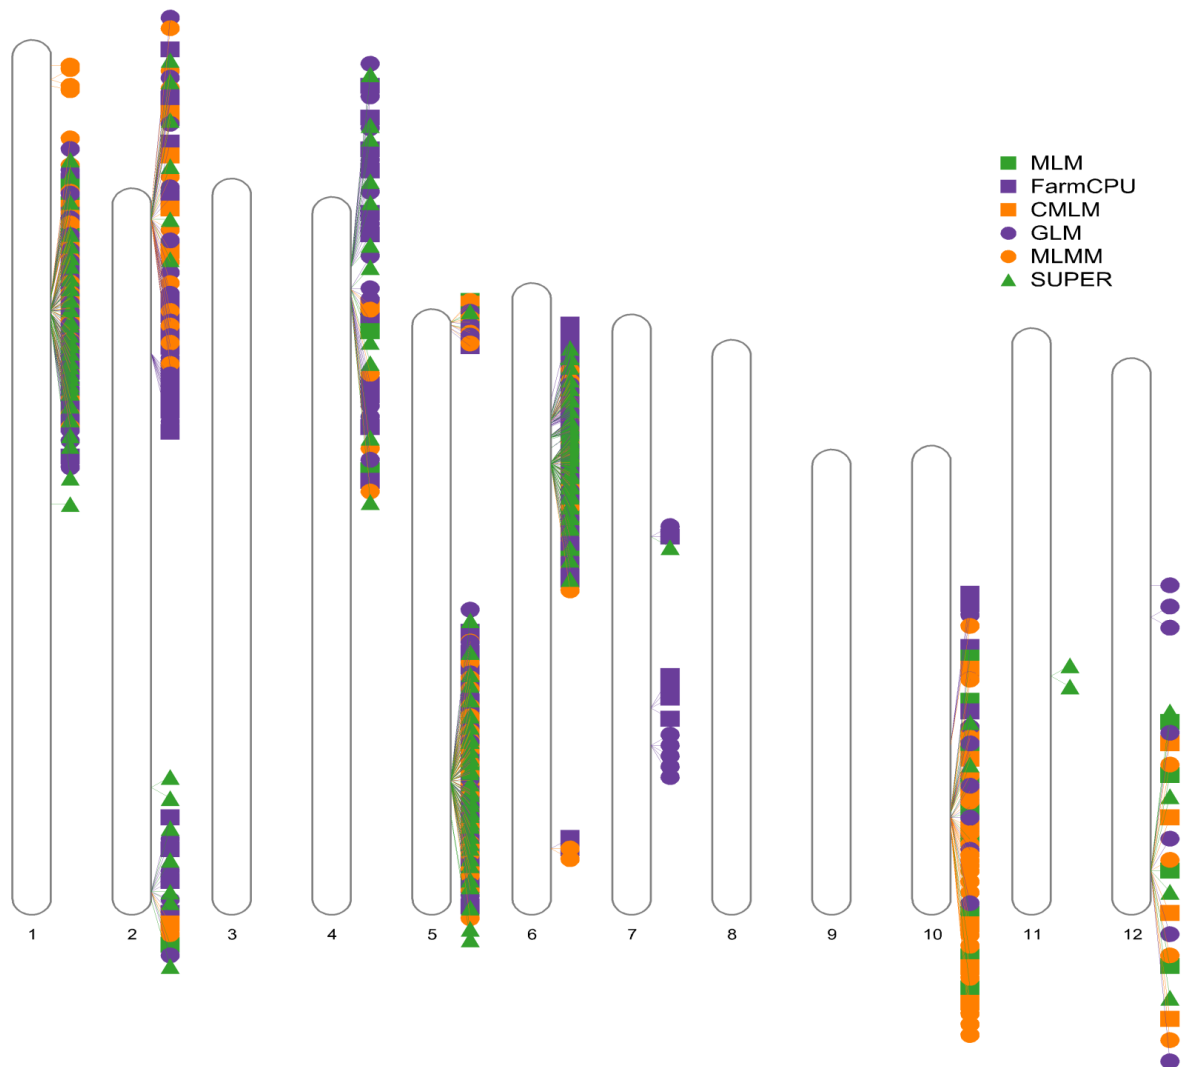

**Supplementary Figure S2: Manhattan plots and Quantile-quantile (QQ) plots of different models for the two test years and across years**

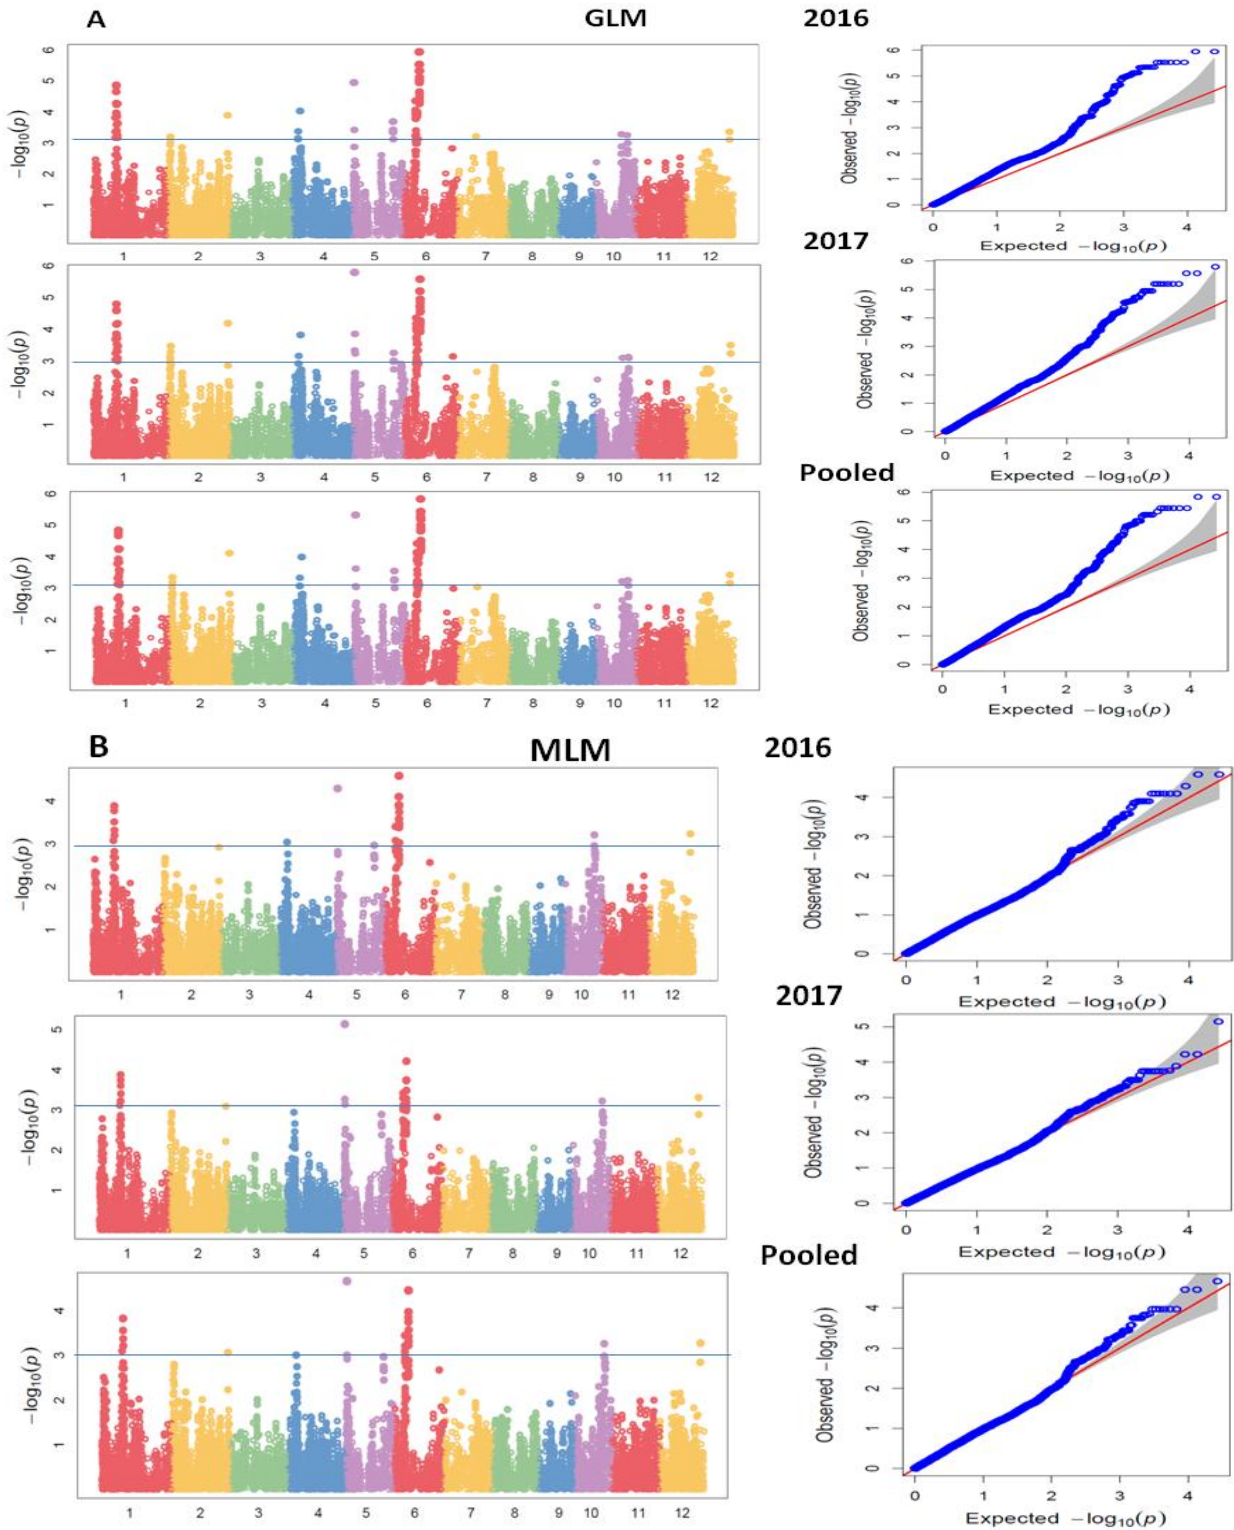

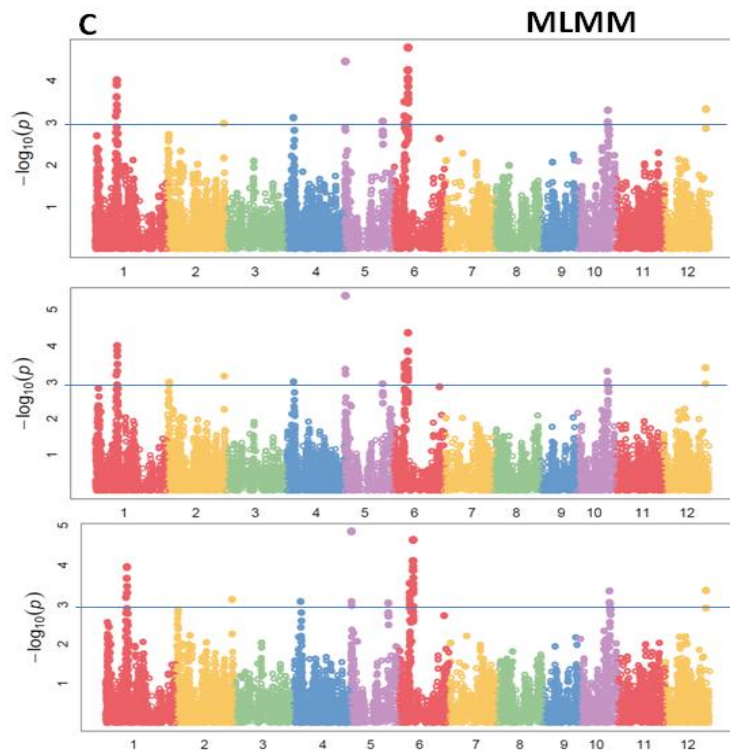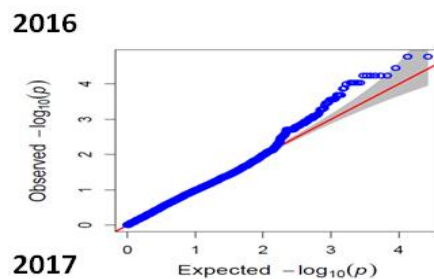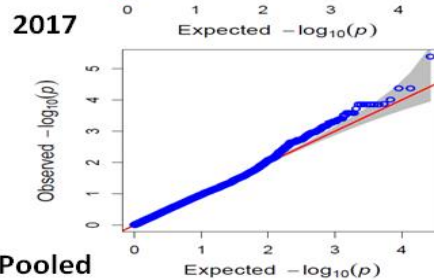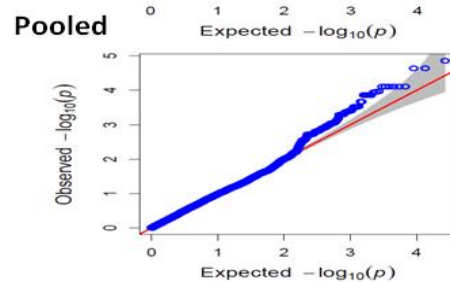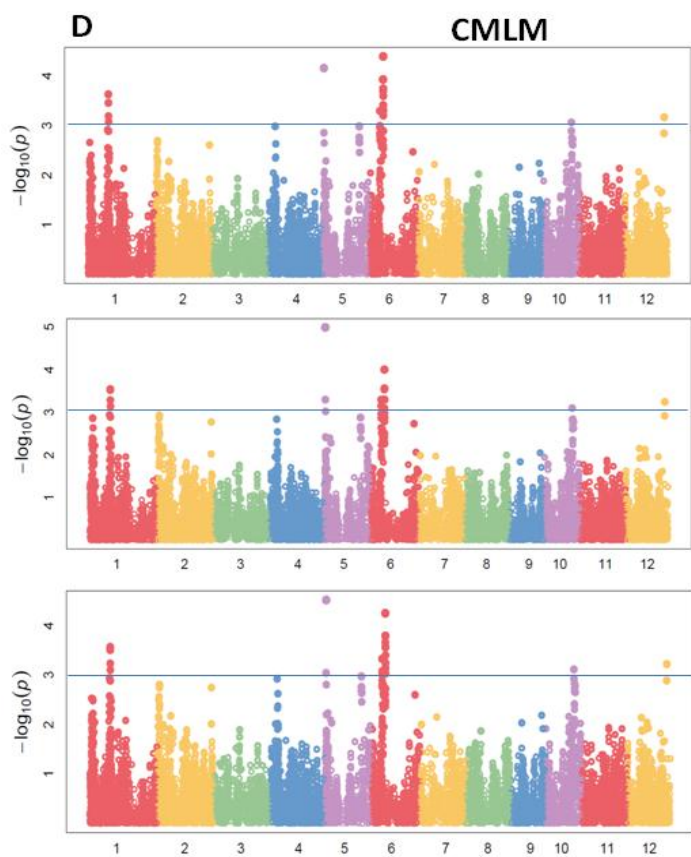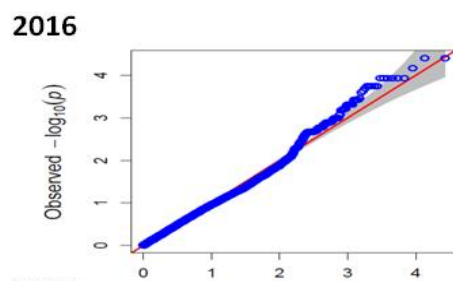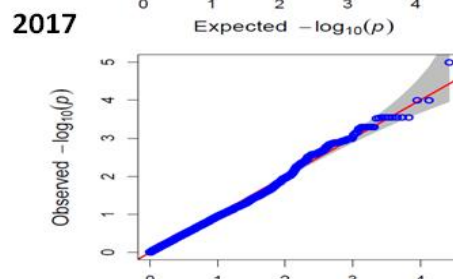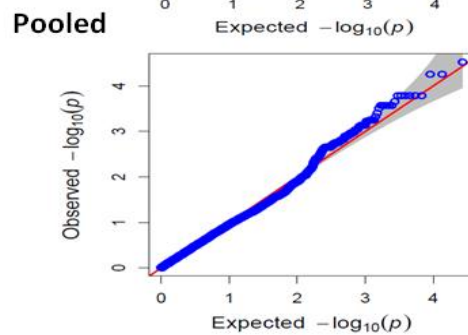

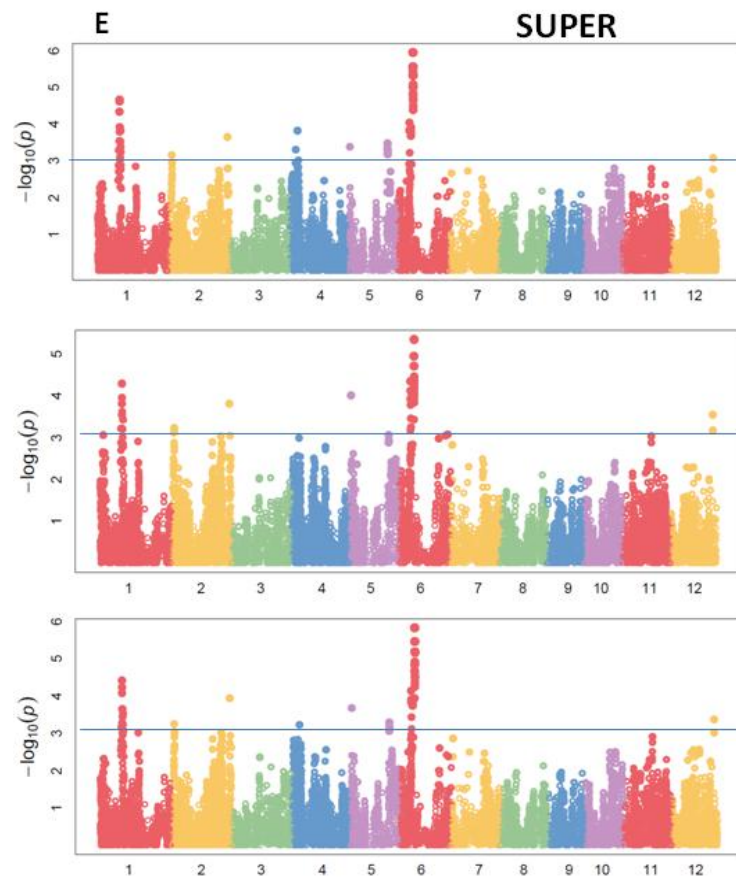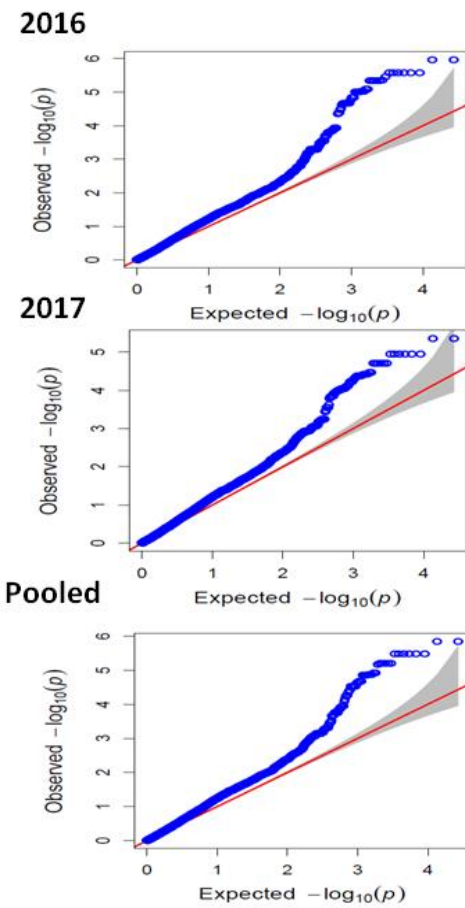

Figure S2 A) GLM  
 Figure S2 B) MLM  
 Figure S2 C) MLMM  
 Figure S2 D) CMLM  
 Figure S2 E) SUPER
